# 1 **Conformational and dynamical plasticity in substrate-binding proteins**

## 2 **underlies selective transport in ABC importers**

3

4 Marijn de Boer<sup>1</sup>, Giorgos Gouridis<sup>1,2,3</sup>, Ruslan Vietrov<sup>4</sup>, Stephanie L. Begg<sup>5</sup>, Gea K. Schuurman-  
5 Wolters<sup>4</sup>, Florence Husada<sup>1</sup>, Nikolaos Eleftheriadis<sup>1</sup>, Bert Poolman<sup>4\*</sup>, Christopher A. McDevitt<sup>5,6\*</sup>,  
6 Thorben Cordes<sup>1,2\*</sup>

7

8 <sup>1</sup>Molecular Microscopy Research Group, Zernike Institute for Advanced Materials, University of  
9 Groningen, Nijenborgh 4, 9747 AG Groningen, The Netherlands

10 <sup>2</sup>Physical and Synthetic Biology, Faculty of Biology, Ludwig Maximilians-Universität München,  
11 Großhadernerstr. 2-4, 82152 Planegg-Martinsried, Germany

12 <sup>3</sup>KU Leuven, Department of Microbiology and Immunology, Rega Institute for Medical Research,  
13 Laboratory of Molecular Bacteriology, 3000 Leuven, Belgium

14 <sup>4</sup>Department of Biochemistry, Groningen Biomolecular Science and Biotechnology Institute &  
15 Zernike Institute for Advanced Materials, University of Groningen, Nijenborgh 4, 9747 AG  
16 Groningen, The Netherlands

17 <sup>5</sup>Department of Microbiology and Immunology, The Peter Doherty Institute for Infection and  
18 Immunity, University of Melbourne, Melbourne, Victoria, 3000, Australia

19 <sup>6</sup>Research Centre for Infectious Diseases, School of Biological Sciences, The University of Adelaide,  
20 Adelaide, South Australia, 5005, Australia

21

22 \*Corresponding authors: [b.poolman@rug.nl](mailto:b.poolman@rug.nl), [christopher.mcdevitt@unimelb.edu.au](mailto:christopher.mcdevitt@unimelb.edu.au) &  
23 [cordes@bio.lmu.de](mailto:cordes@bio.lmu.de)

24

25 **Keywords:** ABC transporters, conformational dynamics, single-molecule FRET, substrate-binding  
26 proteins, solute translocation, substrate transport

27

28 **ABSTRACT**

29 Substrate-binding proteins (SBPs) are associated with ATP-binding cassette importers and switch  
30 from an open- to a closed-conformation upon substrate binding providing specificity for transport. We  
31 investigated the effect of substrates on the conformational dynamics of six SBPs and the impact on  
32 transport. Using single-molecule FRET, we reveal an unrecognized diversity of plasticity in SBPs. We  
33 show that a unique closed SBP conformation does not exist for transported substrates. Instead, SBPs  
34 sample a range of conformations that activate transport. Certain non-transported ligands leave the  
35 structure largely unaltered or trigger a conformation distinct from that of transported substrates.  
36 Intriguingly, in some cases similar SBP conformations are formed by both transported and non-  
37 transported ligands. In this case, the inability for transport arises from slow opening of the SBP or the  
38 selectivity provided by the translocator. Our results reveal the complex interplay between ligand-SBP  
39 interactions, SBP conformational dynamics and substrate transport.

## 40 INTRODUCTION

41 ATP-binding cassette (ABC) transporters facilitate the unidirectional trans-bilayer movement of a  
42 diverse array of molecules using the energy released from ATP hydrolysis<sup>1</sup>. ABC transporters share a  
43 common architecture, with the translocator unit comprising two transmembrane domains (TMDs) that  
44 form the translocation pathway and two cytoplasmic nucleotide-binding domains (NBDs) that bind  
45 and hydrolyse ATP. ABC importers require an additional extra-cytoplasmic accessory protein referred  
46 to as a substrate-binding protein SBP or domain SBD (hereafter SBDs and SBPs are both termed  
47 SBPs)<sup>2-4</sup>. ABC importers that employ SBPs can be subdivided as Type I or Type II based on structural  
48 and mechanistic distinctions<sup>5, 6</sup>. A unifying feature of the transport mechanism of Type I and Type II  
49 ABC importers is the binding and delivery of substrate from a dedicated SBP to the translocator unit  
50 for import into the cytoplasm.

51 Bacterial genomes encode multiple distinct ABC importers to facilitate the acquisition of  
52 essential nutrients such as sugars, amino acids, vitamins, compatible solutes, and metal ions<sup>1, 7</sup>. Many  
53 ABC importers can transport more than one substrate using high-affinity interactions between SBPs  
54 and transported ligands (herein termed cognate substrates)<sup>2</sup>. Despite low sequence similarity between  
55 SBPs of different ABC importers, they share a common architecture comprising two structurally  
56 conserved rigid lobes connected by a flexible hinge region (**Figure 1**)<sup>2</sup>. Numerous biophysical<sup>8</sup> and  
57 structural analyses<sup>9</sup> indicate that ligand binding at the interface of the two lobes facilitates switching  
58 between two conformations, i.e. from an open to a closed conformation. Bending and unbending of the  
59 hinge region brings the two lobes together (closed conformation) or apart (open conformation),  
60 respectively. Crystallographic analysis show that the amount of opening varies between different  
61 SBPs; the lobe-movements observed range from small rearrangements as in the Type II SBP BtuF<sup>10</sup>, to  
62 complete reorientation of both lobes by angles as large as 60° in the Type I SBP LivJ<sup>11</sup>. Nevertheless,  
63 the wealth of structural data permits a structural classification of SBPs, wherein the hinge region is the  
64 most defining feature of each sub-group or cluster (**Figure 1**)<sup>2, 3</sup>. Crystal structures of the same protein,  
65 but with different ligands bound, generally report the same degree of closing of the SBP<sup>11-15</sup>.

66 It thus is assumed that the conformational switching of the SBPs enables the ABC transporter  
67 to allosterically sense the loading state of the SBP-ligand complex ('translocation competency'),  
68 thereby contributing to transport specificity<sup>7, 9</sup>. For example, crystal structures of the SBP MalE show

69 that the protein adopts a unique closed conformation when interacting with cognate ligands maltose,  
70 maltotriose and maltotetraose<sup>15</sup>, while the non-transported ligand  $\beta$ -cyclodextrin is bound by MalE<sup>16, 17</sup>  
71 but fails to trigger formation of the closed conformation<sup>17-19</sup>. Ligands that are bound by the SBP, but  
72 not transported, are termed herein non-cognate ligands. Such findings suggest that only SBPs that  
73 adopt the closed conformation can productively interact with the translocator and initiate transport.  
74 However, the TMDs of certain ABC importers were also shown to interact directly with their  
75 substrates. In MalFGK<sub>2</sub>E<sup>20</sup> from *Escherichia coli* and Art(QM)<sub>2</sub><sup>21</sup> from *Thermoanaerobacter*  
76 *tengcongensis* substrate-binding pockets have been identified inside the TMDs, and these might be  
77 linked to regulation of transport. Similar binding pockets within the TMDs have not been observed in  
78 the high-resolution structures of other ABC importers, although cavities through which the substrate  
79 passes in the transition of the TMD from outward- to inward-facing must be present in all the  
80 transporters<sup>22-24</sup>. Additional complexity exists for the coupling of SBP conformational switching and  
81 the ligand recognition process, as crystallographic<sup>25, 26</sup>, nuclear magnetic resonance (NMR)<sup>27</sup> and  
82 single-molecule<sup>28, 29</sup> studies indicate that SBPs can undergo intrinsic conformational changes in the  
83 absence of substrate. Furthermore, crystal structures of the SBPs MalE and a D-xylose SBP in an open  
84 ligand-bound conformation were obtained<sup>30, 31</sup>. Such observations question the precise relationship  
85 between SBP-ligand interactions, SBP conformational changes and their involvement in transport  
86 function.

87 A range of biophysical and structural approaches have already been used to decipher the  
88 mechanistic basis of SBP-ligand interactions<sup>8, 9, 11, 17, 19</sup>. However, these techniques only provide  
89 information on the overall population of molecules. Recent advances in single-molecule  
90 methodologies now permit new insight into the conformational heterogeneity, dynamics and  
91 occurrences of rare events in SBPs<sup>28, 29, 32-35</sup>, which are difficult to obtain in bulk measurements. Here,  
92 we combined single-molecule Förster resonance energy transfer (smFRET)<sup>36</sup> and transport  
93 measurements to investigate how cognate and non-cognate substrates influence the conformational  
94 states and the underlying dynamics of SBPs. Six distinct SBPs were selected (**Figure 1**)<sup>37-41</sup>, based on  
95 two criteria. First, they cover the breadth of SBP structural classes: PsaA (cluster A), MalE (cluster B),  
96 OppA (cluster C), SBD1 and SBD2 of GlnPQ, and OpuAC (all cluster F). The selected SBPs provide  
97 coverage of hinge region diversity<sup>2, 3</sup>, thereby addressing a hypothesized key determinant in SBP

98 conformational dynamics. Moreover, subtle structural or sequence differences among SBPs that  
99 belong to the same cluster are addressed by examining SBD1, SBD2 and OpuAC that all belong to  
100 cluster F. Second, the selected SBPs belong to Type I and Type II ABC importers with extensively  
101 characterized substrate (cognate and non-cognate) interactions, such as metal ions (PsaA)<sup>40</sup>, sugars  
102 (MalE)<sup>42</sup>, peptides (OppA)<sup>43</sup>, amino acids (SBD1 and SBD2)<sup>37</sup>, and compatible solutes (OpuAC)<sup>38</sup>.

103

104

## 105 **RESULTS**

### 106 **Multiple SBP conformations are translocation competent**

107 Crystal structures of SBPs suggest that ligand binding is coupled to switching between two protein  
108 conformations, an open and a closed conformation. Mechanistically this process has been linked to the  
109 allosteric regulation of substrate transport<sup>7-9, 44-48</sup>. Here, we assessed this model by investigating the  
110 interaction of six SBPs, PsaA, MalE, OppA, SBD1, SBD2 and OpuAC, with a range of cognate  
111 substrates. We employed single-molecule FRET to analyse SBP conformations, wherein each of the  
112 two SBP lobes was labelled with either a donor or an acceptor fluorophore (**Figure 2A**)<sup>29, 49</sup>. Surface-  
113 exposed and non-conserved residues, showing largest distance changes according to the crystal  
114 structures of the open and closed states, were chosen as suitable cysteine positions for labelling.  
115 Protein labelling did not alter the ligand-binding affinity, that is, the ligand dissociation constant  $K_D$   
116 (**Table 1**). In our assays, the inter-dye separation reports on the relative orientation and distance  
117 between the SBP lobes and is thus indicative for the degree of closing. Steady-state anisotropy  
118 measurements indicate that the dyes retain sufficient rotational freedom (**Table 2**) so that relative  
119 inter-dye distances can be accessed via the apparent FRET efficiency of freely diffusing or surface-  
120 immobilized protein molecules. Although this approach monitors only a single distance in the SBP, it  
121 permits rapid screening of ligand induced conformational changes in physiologically relevant  
122 conditions.

123 The apparent FRET efficiency of individual and freely-diffusing SBPs were measured in the  
124 presence and absence of their cognate substrates by using confocal microscopy. Saturating  
125 concentrations of cognate substrate, above the dissociation constant  $K_D$  (**Table 1**), shift the FRET  
126 efficiency histograms and the fitted Gaussian distributions to higher values compared to the ligand-

127 free SBPs (**Figure 2B-G; Table 3**), indicating a reduced distance between the SBP lobes and thus  
128 closure of the proteins. The solution-based FRET distributions of ligand-bound and ligand-free SBPs  
129 are unimodal and thus do not reveal any substantial conformational heterogeneity, such as a  
130 pronounced closing in the absence of substrate or a substantial population of an open-liganded state  
131 (*vide infra*). This strongly suggests that ligands are bound via an induced-fit mechanism, unless  
132 dynamics occurs on timescales faster than milliseconds. This inference was confirmed for OppA by  
133 examining individual surface-immobilized proteins and demonstrating that substrate-induced SBP  
134 closing follows first-order kinetics while the opening obeys zeroth-order kinetics (**Figure 2 – figure**  
135 **supplements 1**)<sup>32</sup>.

136 Further examination of the FRET distributions shows that multiple substrate-bound SBP  
137 conformations exist for SBD1, SBD2 and MalE (**Figure 2D-F**). For the amino acid binding-proteins  
138 SBD1 and SBD2, the cognate substrates<sup>37</sup> asparagine and glutamine for SBD1, and glutamine and  
139 glutamate for SBD2 all stabilize a distinct protein conformation, as the FRET efficiency histograms  
140 and the fitted Gaussian distributions are different (**Figure 2E-F; Table 3**). For the maltodextrin  
141 binding-protein MalE we examined the effect of cognate maltodextrins<sup>39</sup>, ranging from two to seven  
142 glucosyl units, on the MalE conformation. Comparison of the FRET efficiency histograms of the  
143 different MalE-ligand complexes shows that at least three distinct ligand-bound MalE conformations  
144 exist (**Figure 2D; Figure 2 – figure supplements 2A**). Contrary to SBD1 and SBD2, some cognate  
145 substrates did not induce a unique MalE conformation. For example, maltopentaose and maltohexaose  
146 elicited the same FRET change, and triggered the formation of a partial closed MalE conformation  
147 (**Figure 2 – figure supplements 2A**). However, this conformational state is different from the full  
148 closed form of MalE, which is obtained by maltose, maltotriose and maltotetraose, or the other partial  
149 closed conformation that is formed by binding of maltoheptaose (**Figure 2 – figure supplements 2A**).  
150 The results for MalE were confirmed by examining different inter-dye positions (**Figure 2H; Figure 2**  
151 **– figure supplements 3**).

152 However, whether this conformational plasticity is a universal feature among SBPs needs to  
153 be tested further, because in OppA the four examined cognate substrates<sup>43</sup> elicited the same FRET  
154 change (**Figure 2G; Figure 2 – figure supplements 2B**). Taken together, these data indicate that  
155 although the examined SBPs have a single open conformation, a productive interaction between the

156 SBP and the translocator does not require a single, unique closed SBP conformation. The structural  
157 flexibility of the SBP permits the formation of one or more ligand-bound conformations, all of which  
158 are able to interact with the translocator and initiate transport<sup>37-40, 43</sup>.

159

### 160 **Intrinsic conformational changes of SBPs**

161 We then investigated whether the conformational changes in the SBPs that were triggered by their  
162 ligands, can also occur in their absence. To address this, we investigated surface-tethered SBPs in the  
163 absence of ligand and used confocal scanning microscopy to obtain millisecond temporal resolution.  
164 Compared to the solution-based smFRET experiments, individual surface-tethered SBPs greatly  
165 increase the sensitivity to detect rare events. In contrast to prior work<sup>28, 29, 32, 33</sup>, the labelled SBPs were  
166 supplemented with high concentrations of unlabelled protein (20  $\mu$ M), or the divalent chelating  
167 compound ethylenediaminetetraacetic acid (EDTA, [c] = 1 mM for PsaA), to remove any  
168 contaminating ligands (**Figure 3A**). Contaminations could otherwise lead to conformational changes  
169 that are misinterpreted as intrinsic closing of the SBP. Consistent with the solution-based  
170 measurements, all SBPs were predominately in a low FRET state (open conformation; **Figure 3B-G**;  
171 **Figure 3 – figure supplements 1**). For ligand-free MalE, PsaA and OpuAC, no transitions to higher  
172 FRET states were observed within a total observation time of >8 min for each SBP (**Figure 3B-D**;  
173 **Table 4**). In SBD1, SBD2 and OppA rare transitions to a high FRET state can be observed and have  
174 an average lifetime of  $110 \pm 14$ ,  $77 \pm 7$  and  $230 \pm 50$  ms (mean  $\pm$  s.e.m.) for SBD1, SBD2 and OppA,  
175 respectively (**Figure 3E-G**; **Figure 3 – figure supplements 1D-F**). Transitions towards these states  
176 occur only rarely, i.e. on average every 15, 10 or 20 s for SBD1, SBD2 and OppA, respectively  
177 (**Figure 3H**; **Table 4**). Taken together, some SBPs have the ability to also close without the ligand on  
178 the second timescale. However, not all SBPs show intrinsic conformational transitions, unless these  
179 occur below the temporal resolution of the measurements (millisecond timescale). Overall, the data  
180 indicate that diversity exists in the conformational dynamics of ligand-free SBPs.

181

### 182 **How do non-transported substrates influence the SBP conformation?**

183 Ensemble FRET measurements using all proteinogenic amino acids and citruline were performed to  
184 obtain full insight into substrate specificity of SBD1 and SBD2 of GlnPQ. We find that asparagine,

185 glutamine and histidine elicit a FRET change in SBD1, and glutamine in SBD2 (**Figure 4 - figure**  
186 **supplements 1**); glutamate triggers a change in SBD2 at low pH, that is, when a substantial fraction of  
187 glutamic acid is present. No other amino acid affected the apparent FRET efficiency. Arginine and  
188 lysine, however, competitively inhibit the conformational changes induced by asparagine binding to  
189 SBD1 and glutamine binding to SBD2 (**Figure 4 - figure supplements 2**). Uptake experiments in  
190 whole cells and in proteoliposomes show that histidine, lysine and arginine are not transported by  
191 GlnPQ, but these amino acids can inhibit the uptake of glutamine (via SBD1 and SBD2) and  
192 asparagine (via SBD1) (**Figure 4A-C**). Thus, some amino acids interact with the SBPs of GlnPQ but  
193 fail to trigger transport. Similar ligands have been identified for MalE, OpuAC and PsaA<sup>16, 38-40</sup>, and  
194 we refer to these as non-cognate substrates. We then used smFRET to test whether or not ligand-  
195 induced SBP conformational changes allow discriminating cognate from non-cognate substrates.

196 For most non-cognate substrates, we observe at saturating concentrations that the mean FRET  
197 efficiencies are altered compared to the ligand-free conditions (**Figure 4D-H; Table 3**). This shows  
198 that, similar to cognate ligands (**Figure 3B-G**), non-cognate ligand binding is coupled to SBP  
199 conformational changes. However, this is not generally true, as the binding of the non-cognate  
200 substrates, i.e., arginine or lysine for SBD1 and arginine for SBD2 do not alter the FRET efficiency  
201 histograms (**Figure 4D-E**), suggesting that these ligands bind in the open conformation of the SBP and  
202 do not trigger a conformational change.

203 Further analysis of the non-cognate ligand-induced conformational changes reveals states that  
204 vary, from larger opening (carnitine-OpuAC, **Figure 4G**), to partial (histidine-SBD1, **Figure 4D**;  
205 various maltodextrin-MalE complexes, **Figure 4F**; proline-OpuAC, **Figure 4G**) or full closing (Zn<sup>2+</sup>-  
206 PsaA, **Figure 4H**) of the SBP relative to the ligand-free state of the corresponding protein. The data of  
207 full closing by Zn<sup>2+</sup> (non-cognate) and Mn<sup>2+</sup> (cognate) were confirmed by examining different inter-  
208 dye positions in PsaA (**Table 3**) and are in line with prior crystallographic analyses<sup>40, 50</sup>. Noteworthy,  
209 the non-cognate substrate histidine and the cognate substrate glutamine induce both partial closing of  
210 SBD1 (**Figure 4D**). However, histidine elicited a larger FRET shift in SBD1 than glutamine, but  
211 smaller than the cognate substrate asparagine, which induces full closing (**Figure 4D**). On the other  
212 hand, the FRET shift induced with certain non-cognate ligands in MalE ( $\beta$ -cyclodextrin, maltotriitol  
213 and maltotetraitol) and OpuAC (proline) are smaller (or similar; *vide infra*) than with their cognate



214 ligands (**Figure 4F-G**). Intriguingly, the data also suggest that the partially closed SBP-ligand  
215 complexes of MalE formed with the non-cognate substrates maltooctose or maltodecaose are similar  
216 to that of the cognate substrate maltoheptaose (**Figure 4F**). Again, this result was confirmed by  
217 examining different inter-dye positions in MalE (**Table 3**).

218 In summary, similar to cognate substrates, non-cognate substrates do not induce a single  
219 unique ligand-bound SBP state, and solely from the degree of SBP closing a translocator cannot  
220 readily discriminate cognate from non-cognates substrates. Notable exceptions are the substrates that  
221 do not induce closing and keep the SBP in the open state or even to a more extended state. This raises  
222 fundamental questions as to the mechanistic basis for how certain non-cognate substrates are still  
223 excluded from import.

224

### 225 **Altered SBP opening renders PsaA permissive for non-cognate ligand transport**

226 The inability of certain substrates to be transported, while they appear to induce SBP conformations  
227 that are similar to those associated with cognate substrates, was observed for MalE (**Figure 4F**) and  
228 PsaA (**Figure 4H**). First, this was investigated further for PsaA. Upon addition of 1 mM EDTA to  
229 PsaA-Mn<sup>2+</sup>, lower FRET efficiencies are instantaneously recorded (**Figure 5A**), indicating that the  
230 lifetime of the closed PsaA-Mn<sup>2+</sup> conformation is shorter than a few seconds. By contrast, Zn<sup>2+</sup> kept  
231 PsaA closed, irrespective of the duration of the EDTA treatment (up to 15 min) (**Figure 5B**).  
232 Irreversible and reversible binding of these metals was shown previously<sup>51</sup>, which can now be  
233 explained by the extremely slow and fast opening of PsaA in the presence of Mn<sup>2+</sup> and Zn<sup>2+</sup>,  
234 respectively. The slow opening of PsaA may explain why Zn<sup>2+</sup> is not transported by PsaBCA, but it is  
235 also possible that the TMDs controls the transport specificity<sup>20, 21</sup>. To discriminate between these two  
236 scenarios, we examined the impact of altered SBP dynamics on the transport activity of PsaBC. We  
237 substituted an aspartate in the binding site with asparagine (D280N), which has previously been shown  
238 to perturb the stability of the Zn<sup>2+</sup>-bound SBP<sup>51</sup>. Analysis of PsaA and PsaA(D280N), at saturating  
239 Zn<sup>2+</sup> concentrations, revealed similar FRET efficiency histograms for the two proteins (**Figure 5C**,  
240 **Table 3**). However, in contrast to the Zn<sup>2+</sup>-PsaA complex, opening of the PsaA(D280N) complex  
241 renders Zn<sup>2+</sup> accessible to EDTA, similar to the cognate ligand Mn<sup>2+</sup> (**Figure 5A,C**). The ability of  
242 PsaA(D280N) to open and release Zn<sup>2+</sup> was then assessed by measuring the cellular accumulation of

243  $Zn^{2+}$  within *Streptococcus pneumoniae*, the host organism. This was achieved by replacement of the  
244 *psaA* gene with the D280N mutant allele ( $\Omega psA_{D280N}$ ) in a strain permissive for  $Zn^{2+}$  accumulation,  
245 i.e. incapable of  $Zn^{2+}$  efflux due to deletion of the exporter *CzcD* ( $\Omega psA_{D280N} \Delta czcD$ )<sup>52</sup>. Our data show  
246 that cellular  $Zn^{2+}$  accumulation increases in the strain expressing PsaBC with PsaA(D280N) but not  
247 with wild-type PsaA (**Figure 5D**). These results demonstrate that the altered conformational dynamics  
248 of the PsaA derivative renders ligand release permissive for transport of non-cognate  $Zn^{2+}$  ions. The  
249 data also show that translocator activity is not directly influenced by the nature of the metal ion  
250 released by PsaA. Collectively, our findings show that transport specificity of PsaBCA is dictated by  
251 the opening kinetics of PsaA.

252

### 253 **MalE conformational dynamics with cognate and non-cognate substrates**

254 Next, we determined the conformational dynamics of MalE induced by maltoheptaose, maltooctaose  
255 and maltodecaose. Similar to  $Zn^{2+}$  and  $Mn^{2+}$  in PsaA (**Figure 4H**), these substrates appear to induce  
256 similar MalE conformations (**Figure 4F**), but only maltoheptaose is transported<sup>39</sup>. Measurements on  
257 individual surface-tethered MalE proteins, in the presence of maltoheptaose, maltooctaose or  
258 maltodecaose, showed frequent switching between low and higher FRET states, corresponding to  
259 opening and closing of the protein (**Figure 6A-D**). The mean lifetime of the ligand-bound  
260 conformations, e.g. the mean lifetime of the higher FRET states, are  $328 \pm 8$  ms for cognate  
261 maltoheptaose and  $319 \pm 12$  ms and  $341 \pm 8$  ms for non-cognate maltooctaose and maltodecaose,  
262 respectively (mean  $\pm$  s.e.m.; **Figure 6A, Figure 6 – figure supplements 1**). So, contrary to PsaA- $Zn^{2+}$   
263 (**Figure 5**), a slow opening of MalE and inefficient ligand release kinetics cannot explain why  
264 maltooctaose and maltodecaose are not transported; the average lifetimes with maltooctaose or  
265 maltodecaose are not significantly different from that with maltoheptaose ( $P=0.68$ , one-way analysis  
266 of variance (ANOVA); **Figure 6A**). Most likely, the failure of the maltose system to transport  
267 maltooctaose and maltodecaose originates in the dimensions of the substrate cavity within the  
268 translocator domain of MalFGK<sub>2</sub><sup>20</sup>.

269

270 **Translocator/SBP interplay determines the rate of transport**

271 Finally, we sought to elucidate the mechanistic basis for how substrate preference arises in the maltose  
272 system and to what degree the translocator contributes to this process. First, we investigated how the  
273 MalE conformational dynamics influences the transport rate of the substrate maltose. For this we used  
274 the hinge-mutant variant MalE(A96W/I329W) that has different conformational dynamics compared  
275 to the wild-type protein (**Figure 6E; Figure 6 – figure supplements 2A-B**)<sup>32</sup>. The mutations are  
276 believed to not affect SBP-translocator interactions since they are situated on the opposite side of the  
277 interaction surface of the SBP<sup>44, 53</sup>.

278 In the presence of saturating concentrations of maltose the FRET efficiency distributions of  
279 MalE and MalE(A96W/I329W) are indistinguishable. This could be confirmed by two different inter-  
280 dye positions in each protein (**Figure 6 – figure supplements 2C**). Therefore, changes in the rate of  
281 maltose transport unlikely arise from differences in SBP docking onto the TMD, since similar SBP  
282 conformations are involved. Nonetheless, cellular growth and the maltose-induced ATPase activity are  
283 reduced for MalE(A96W/I329W)<sup>53, 54</sup>. Analysis of the mean lifetime of the closed conformation of  
284 MalE(A96W/I329W) shows that ligand release is three orders of magnitude slower than in the wild-  
285 type protein [ $63 \pm 6$  ms (mean  $\pm$  s.e.m.) in MalE *versus*  $94 \pm 16$  s (mean  $\pm$  s.e.m.) in  
286 MalE(A96W/I329W); **Figure 6A; Figure 6 – figure supplements 2B**]. These observations suggest  
287 that the maltose-stimulated cellular growth and ATPase activity are reduced due to the slower opening  
288 of MalE(A96W/I329W) compared to wildtype MalE. All this is in line with the observation that  
289 PsaA(D280N) opens fast, allowing transport of the  $Zn^{2+}$  to occur, whereas in wildtype PsaA the  
290 opening of PsaA after  $Zn^{2+}$ -binding is (extremely) slow and transport does not occur (**Figure 5B-D**).

291 We then investigated the relationship between maltodextrin-specific lifetimes of the MalE  
292 closed conformations and published transport rates or ATPase activities of the full transport system<sup>16</sup>.  
293 Here, we focused on the cognate substrates maltose, maltotriose and maltotetraose since  
294 crystallographic<sup>15</sup> and smFRET analysis (**Figure 2 - figure supplements 2A; Table 3**) suggest that  
295 these ligands induce similar MalE conformations. The average lifetime of the closed conformation  
296 with maltose, maltotriose and maltotetraose are  $63 \pm 6$ ,  $124 \pm 4$ , and  $150 \pm 8$  ms (mean  $\pm$  s.e.m.),  
297 respectively (**Figure 6A; Figure 6E-G; Figure 6 - figure supplements 1**). Thus, these lifetimes  
298 correlate positively with their stimulation of the ATPase activity (**Figure 6H**)<sup>16</sup>. A positive relation

299 also exists between the lifetimes with maltose and maltotetraose ( $63 \pm 6$  and  $150 \pm 8$  ms; mean  $\pm$   
300 s.e.m.) and their corresponding transport rates (transport of maltotetraose is  $\sim 1.5$ -fold higher than of  
301 maltose)<sup>16</sup>. The observation that some maltodextrins induce a faster opening of MalE (short lifetime),  
302 while their corresponding transport and/or stimulation of ATP hydrolysis are slower, implies an  
303 involvement of the translocator MalFGK<sub>2</sub> in causing the variability in the transport rate of these  
304 maltodextrins.

305

306

## 307 **DISCUSSION**

308 Prokaryotes occupy diverse ecological niches within terrestrial ecosystems. Irrespective of the niche,  
309 their viability depends on selective acquisition of nutrients from the extracellular environment.  
310 However, the diversity of the external milieu poses a fundamental challenge for how acquisition of  
311 specific compounds can be achieved within the constraints of the chemical selectivity conferred by  
312 their import pathways. Numerous studies on SBPs associated with ABC importers have established  
313 that these proteins share a common architecture with a well-defined high-affinity ligand-binding site  
314 and have the ability to adopt distinct ligand-free and -bound conformations, i.e. open and closed,  
315 respectively<sup>2, 7, 8</sup>. Building on this knowledge, we investigated the relationship between SBP  
316 conformational dynamics, SBP-ligand interactions and substrate transport.

317 The general view of SBP conformational changes serving as a binary switch to communicate  
318 transport competency may hold for some SBPs, such as OppA (**Figure 2 – figure supplements 2B**),  
319 while others employ multiple distinct ligand-bound conformations (**Figure 2D-F; Figure 4D-G**). To  
320 our knowledge, such extreme conformational plasticity of SBPs has not been observed before. MalE  
321 shows a remarkable structural flexibility of at least six different ligand-bound conformations (**Figure**  
322 **2D; Figure 4F**). SBD1 (**Figure 2E; Figure 4D**) can sample at least four distinct ligand-bound  
323 conformations and SBD2 (**Figure 2F; Figure 4E**) and OpuAC (**Figure 2B; Figure 4G**) at least three.  
324 Moreover, MalE, SBD1 and SBD2 have multiple distinct ligand-bound conformations that can all  
325 interact with the translocator, as they all facilitate substrate import ('multiple conformations activate  
326 transport' in **Figure 7; Figure 2D-F**). Thus, a productive SBP-translocator interaction in Type I ABC  
327 importers can be accomplished without relying on strict structural requirements for docking. This

328 generalization may not apply to all Type I ABC importers since in the Opp importer the translocator  
329 might only interact with a unique closed conformation of the SBP OppA (**Figure 2 – figure**  
330 **supplements 2B**), and Opp has no measurable affinity for its open ligand-free conformation<sup>46</sup>.

331 Exclusion of non-cognate substrates is also a critical biological function for SBPs. Our work  
332 has uncovered a hitherto unappreciated complexity in protein-ligand interactions and how this is  
333 coupled to regulation of substrate import. Similar to transport, exclusion of non-cognate ligands might  
334 be achieved by multiple distinct mechanisms. We have shown that although multiple SBP  
335 conformations can activate transport (**Figure 2D-F**), not all SBP conformational states appear to  
336 provide the signal to facilitate transport. For example, the binding of certain non-cognate ligands  
337 induces a conformational change in SBD1 (**Figure 4D**), MalE (**Figure 4F**) and OpuAC (**Figure 4G**)  
338 that are distinct from those that facilitate transport. However, non-cognate substrate binding is not  
339 always coupled to an SBP conformational change, as observed for the binding of arginine or lysine to  
340 SBD1 and arginine to SBD2 (**Figure 4D-E**). These observations provide a general explanation on how  
341 substrate import can fail in Type I ABC importers, which would be due to the SBP-ligand complex  
342 assuming a conformation that cannot initiate allosteric interactions with the translocator  
343 ('conformational mismatch' in **Figure 7**). A similar hypothesis was put forward based on the  
344 observation that binding of  $\beta$ -cyclodextrin fails to fully close MalE<sup>17-19</sup>. However, the sole observation  
345 of partial closing of MalE cannot explain why transport of  $\beta$ -cyclodextrin fails, as we here show that  
346 also cognate maltodextrins are able to induce partial closing of MalE (**Figure 2D**).

347 By contrast, in the  $Mn^{2+}$  transporter PsaBCA, a different mechanism is used. In PsaA, the  
348 binding site composition of the SBP precludes the ability of the protein to exclude the non-cognate  
349 substrate  $Zn^{2+}$  from interacting. As a consequence, both metals bind and trigger formation of similar  
350 PsaA conformations ('conformational match' in **Figure 7; Figure 4H**)<sup>40, 50</sup>. Despite this, the two ions  
351 have starkly different conformational dynamics, with  $Zn^{2+}$  forming a highly stable closed  
352 conformation, such that it cannot open and release the substrate to its translocator ('SBP cannot open'  
353 in **Figure 7; Figure 5**). By altering the binding site interactions between PsaA and  $Zn^{2+}$ , opening is  
354 faster and transport of the metal ion can occur (**Figure 5B-D**). Similar observations were made for  
355 GlnPQ<sup>29, 55</sup> and MalE (**Figure 6E, Figure 6 – figure supplement 2A**), in which a slower/faster  
356 opening of the SBP resulted in a decrease/increase in the corresponding transport of the substrate or

357 ATP hydrolysis rate ('faster SBP opening – faster transport' in **Figure 7**). We therefore conclude that  
358 for ligands that induce highly stabilized SBP-substrate conformations, which require more energy  
359 (thermal or ATP-dependent) to open, transport becomes slower or is abrogated. Based on these  
360 findings, we infer that biological selectivity in ABC importers is largely achieved via a combination of  
361 ligand release kinetics and its influence on the conformational state of the SBP. This provides a  
362 mechanism to facilitate the import of selective substrates, while excluding other compounds.  
363 However, our data also implicate a role for the translocator in contributing to the substrate specificity  
364 of ABC importers, consistent with previous studies<sup>20, 21, 48, 56</sup>.

365 The presence of a substrate binding site in the translocator of the maltose system is well  
366 established<sup>20, 48</sup>, although its role, if any, in influencing the rate of transport of maltodextrins is yet  
367 unknown. The average time required for the different maltodextrin-MalE complexes to open,  
368 correlates positively with the transport and ATP hydrolysis rate (**Figure 6H**)<sup>16</sup>. This implies that the  
369 substrate, after it has been transferred from MalE to the translocator, acts as a trigger for subsequent  
370 steps, for example, the stimulation of ATP hydrolysis and/or P<sub>i</sub> and ADP release ('enhanced  
371 translocator interactions – faster transport' in **Figure 7**). The positive correlation implies that some  
372 maltodextrins trigger these steps more efficient than others, thereby overcoming the slower opening  
373 of MalE, and leading to a preferred uptake of certain maltodextrins over others. Further, analysis of the  
374 non-cognate substrates maltooctaose and maltodecaose showed that these were bound reversibly by  
375 MalE (**Figure 6A**) and can induce a conformation similar that to that of the cognate ligand  
376 maltoheptaose ('conformational match' in **Figure 7**; **Figure 4F**). We speculate that the failure of the  
377 maltose system to transport maltooctaose and maltodecaose most likely arises from the dimensions of  
378 the substrate cavity within the MalFGK<sub>2</sub><sup>20</sup> translocator ('rejected by translocator' in **Figure 7**), rather  
379 than failure of MalE to close and release the substrate.

380 The presence of two consecutive binding pockets, one in the SBP and one in the translocator,  
381 in at least some ABC importers could indicate that specificity of transport occurs through a  
382 proofreading mechanism in a manner analogous to aminoacyl-tRNA synthetases and DNA  
383 polymerase<sup>57, 58</sup>. In such a mechanism, a substrate can be rejected even if it has been bound by the  
384 SBP. Although we show that intrinsic closing is a rare event ('little intrinsic closing' in **Figure 7**; data  
385 in **Figure 3**), it might influence transport in a cellular context where the ratio between SBP and

386 translocator can be high<sup>59</sup>. Moreover, other fast ( $\mu$ s-ms) and short-range conformational changes might  
387 be present as shown by NMR analysis on Male<sup>27</sup>. We speculate that in Type I ABC importers the  
388 wasteful conversion of chemical energy is prevented by a proofreading mechanism, as any thermally  
389 driven closing event would not be able to initiate the translocation cycle, as the substrate is absent. In  
390 accordance, ATP hydrolysis and transport are tightly coupled in the Type I importer GlnPQ<sup>60</sup> that,  
391 based on the crystal structure of the homologous Art(QM)<sub>2</sub><sup>21</sup>, contains an internal binding pocket  
392 located within the TMDs. By contrast, high futile hydrolysis of ATP in the Type II BtuCDF<sup>61</sup> appears  
393 to correlate with the lack of a defined binding pocket inside the TMDs.

394

395

## 396 **METHODS**

### 397 **Gene expression and SBP purification**

398 N-terminal extension of the soluble SBPs with a His<sub>x</sub> tag (His<sub>10</sub>PsaA, His<sub>10</sub>SBD1, His<sub>10</sub>SBD2,  
399 His<sub>10</sub>OppA and His<sub>6</sub>OpuAC) were expressed and purified as previously described<sup>29, 38, 43, 51</sup>. The *male*  
400 gene (UniProtKB-P0AEX9) was isolated from the genome of *Escherichia coli* K12. The primers were  
401 designed to exclude the signal peptide (amino acids 1-26). Primers introduced *Nde*I and *Hind*III  
402 restriction sites, and the gene product was sub-cloned in the pET20b vector (Novagen, EMD  
403 Millipore). Protein derivatives having the cysteine or other point mutations were constructed using  
404 QuikChange mutagenesis<sup>62</sup> and Megaprimer PCR mutagenesis<sup>63</sup> protocols. Primers are indicated in  
405 Table 5. His<sub>6</sub>Male was over-expressed in *E. coli* BL21 DE3 cells (*F-ompT gal dcm lon hsdSB(r<sub>B</sub>-m<sub>B</sub>)*  
406  $\lambda$ (DE3 [*lacI lacUV5-T7p07 ind1 sam7 nin5*]) [malB+]K-12( $\lambda$ S)). Cells harbouring plasmids  
407 expressing the Male wild-type and derivatives were grown at 30°C until an optical density (OD<sub>600</sub>) of  
408 0.5 was reached. Protein expression was then induced by addition of 0.25 mM isopropyl  $\beta$ -D-1-  
409 thiogalactopyranoside (IPTG). After 2 hours induction cells were harvested. DNase 500  $\mu$ g/ml  
410 (Merck) was added and passed twice through a French pressure cell at 1,500 psi and 2mM  
411 phenylmethylsulfonyl fluoride (PMSF) was added to inhibit proteases. The soluble supernatant was  
412 isolated by centrifugation at 50,000  $\times g$  for 30 min at 4 °C. The soluble material was then purified and  
413 loaded on Ni<sup>2+</sup>-sepharose resin (GE Healthcare) in 50 mM Tris-HCl, pH 8.0; 1 M KCl, 10 % glycerol;  
414 10 mM imidazole, 1 mM dithiothreitol (DTT). The immobilized proteins were washed (50 mM Tris-

415 HCl, pH 8.0; 50 mM KCl, 10 % glycerol; 10 mM Imidazole; 1 mM DTT; plus 50 mM Tris-HCl,  
416 pH=8; 1 M KCl, 10 % glycerol; 30 mM imidazole; 1 mM DTT sequentially) and then eluted (50 mM  
417 Tris-HCl, pH 8.0, 50 mM KCl, 10 % glycerol; 300 mM imidazole; 1 mM DTT). Protein fractions were  
418 pooled (supplemented with 5 mM EDTA, 10 mM DTT), concentrated (10.000 MWCO Amicon;  
419 Merck-Millipore), dialyzed against 100-1000 volumes of buffer (50 mM Tris-HCl, pH 8.0; 50 mM  
420 KCl, 50% glycerol; 10 mM DTT), aliquoted and stored at -20°C until required.

421

#### 422 **Uptake experiments in whole cells**

423 *Lactococcus lactis* GKW9000 carrying pNZglnPQhis or derivatives was cultivated semi-anaerobically  
424 at 30 °C in M17 (Oxoid) medium supplemented with 1 % (w/v) glucose and 5 µg/ml chloramphenicol.  
425 For uptake experiments cells were grown in GM17 to an OD<sub>600</sub> of 0.4, induced for 1 hour with 0.01 %  
426 of culture supernatant of the nisin A-producing strain NZ9700 and harvested by centrifugation for 10  
427 min at 4000 x g; the final nisin A concentration is ~1 ng/ml. After washing twice with 10 mM PIPES-  
428 KOH, 80 mM KCl, pH 6.0, the cells were resuspended to OD<sub>600</sub> = 50 in the same buffer. Uptake  
429 experiments were performed at 0.1 – 0.5 mg/ml total protein in 30 mM PIPES-KOH, 30 mM MES-  
430 KOH, 30 mM HEPES-KOH (pH 6.0). Before starting the transport assays, the cells were equilibrated  
431 and energized at 30°C for 3 min in the presence of 10 mM glucose plus 5 mM MgCl<sub>2</sub>. After 3 min, the  
432 uptake reaction was started by addition of either [<sup>14</sup>C]-glutamine, [<sup>14</sup>C]-histidine, [<sup>14</sup>C]-arginine, [<sup>14</sup>C]-  
433 lysine (all from Perkin Elmer) or [<sup>3</sup>H]-asparagine (ARC); the specific radioactivity was adjusted for  
434 each experiment (amino acid concentration) to obtain sufficient signal above background; the final  
435 amino acid concentrations are indicated in the figure legends. At given time intervals, samples were  
436 taken and diluted into 2 ml ice-cold 100 mM LiCl. The samples were rapidly filtered through 0.45 µm  
437 pore-size cellulose nitrate filters (Amersham) and the filter was washed once with ice-cold 100 mM  
438 LiCl. The radioactivity on the filters was determined by liquid scintillation counting.

439

#### 440 **Purification and membrane reconstitution of GlnPQ for in vitro transport assays**

441 Membrane vesicles of *Lactococcus lactis* GKW9000 carrying pNZglnPQhis were prepared as  
442 described before<sup>60</sup>. For reconstitution into proteoliposomes, 150 mg of total protein in membrane  
443 vesicles was solubilized in 50 mM potassium phosphate pH 8.0, 200 mM NaCl, 20% glycerol and



444 0.5% (w/v) DDM for 30 minutes at 4 °C. The sample was centrifuged (12 min, 300,000 $\times$ g) and the  
445 supernatant was collected. Subsequently, GlnPQ was allowed to bind to Ni-Sepharose (1.5 ml bed  
446 volume) for 1 hour at 4 °C after addition of 10 mM imidazole. The resin was rinsed with 20 column  
447 volumes of wash buffer [50 mM potassium phosphate, pH 8.0, 200 mM NaCl, 20% (v/v) glycerol, 50  
448 mM imidazole plus 0.02% (w/v) DDM]. The protein was eluted with 5 column volumes of elution  
449 buffer [50 mM potassium phosphate, pH 8.0, 200 mM NaCl, 10% (w/v) glycerol, 500 mM imidazole  
450 plus 0.02% (w/v) DDM]. The purified GlnPQ was used for reconstitution into liposomes composed of  
451 egg yolk L- $\alpha$ -phosphatidylcholine and purified *E. coli* lipids (Avanti polar lipids) in a 1:3 ratio (w/w)  
452 as described before<sup>64</sup> with a final protein/lipid ratio of 1:100 (w/w). An ATP regenerating system,  
453 consisting of 50 mM potassium phosphate, pH 7.0, creatine kinase (2.4 mg/ml), Na<sub>2</sub>-ATP (10 mM),  
454 MgSO<sub>4</sub> (10 mM), and Na<sub>2</sub>-creatine-phosphate (24 mM) was enclosed in the proteoliposomes by two  
455 freeze/thaw cycles, after which the vesicles were stored at -80 °C. On the day of the uptake  
456 experiment, the proteoliposomes were extruded 13 times through a polycarbonate filter (200-nm pore  
457 size), diluted to 3 ml with 100 mM potassium phosphate, pH 7.0, centrifuged (265,000g for 20 min),  
458 and then washed and resuspended in 100 mM potassium phosphate, pH 7.0, to a concentration of 50  
459 mg of lipid/ml.

460 Uptake in proteoliposomes was measured in 100 mM potassium phosphate, pH 7.0,  
461 supplemented with 5  $\mu$ M of [<sup>14</sup>C]-glutamine or [<sup>3</sup>H]-asparagine. This medium, supplemented with or  
462 without unlabelled amino acids (asparagine, arginine, glutamine, histidine or lysine), was incubated at  
463 30 °C for 2 min prior to adding proteoliposomes (kept on ice) to a final concentration of 1-5 mg of  
464 lipid/ml. At given time intervals, 40  $\mu$ l samples were taken and diluted with 2 ml of ice-cold isotonic  
465 buffer (100 mM potassium phosphate, pH 7.0). The samples were collected on 0.45- $\mu$ m pore size  
466 cellulose nitrate filters and washed twice as described above. After addition of 2 ml Ultima Gold  
467 scintillation liquid (PerkinElmer), radioactivity was measured on a Tri-Carb 2800TR (PerkinElmer). A  
468 single time-dependent uptake experiment is shown in Figure 4A-C and consistent results were  
469 obtained upon repetition with an independent sample preparation.

470

471 **Zinc accumulation in whole cells**

472 The *S. pneumoniae* D39 mutant strains  $\Omega$ *psaA*<sub>D280N</sub> and  $\Delta$ *czcD* were constructed using the Janus  
473 cassette system<sup>65</sup>. Briefly, the upstream and downstream flanking regions of *psaA* and *czcD* were  
474 amplified using primers (Table 5) with complementarity to either *psaA*<sub>D280N</sub> ( $\Omega$ *psaA*<sub>D280N</sub>), generated  
475 via site-directed mutagenesis of *psaA* following manufacturer instructions (Agilent), or the Janus  
476 cassette ( $\Delta$ *czcD*) and were joined by overlap extension PCR. These linear fragments were used to  
477 replace by homologous recombination *psaA* and *czcD*, respectively, in the chromosome of wild-type  
478 and  $\Delta$ *czcD* strains. For metal accumulation analyses, *S. pneumoniae* strains were grown in a cation-  
479 defined semi-synthetic medium (CDM) with casein hydrolysate and 0.5% yeast extract, as described  
480 previously<sup>66</sup>. Whole cell metal ion accumulation was determined by inductively coupled plasma-mass  
481 spectrometry (ICP-MS) essentially as previously described<sup>52</sup>. Briefly, *S. pneumoniae* strains were  
482 inoculated into CDM supplemented with 50  $\mu$ M ZnSO<sub>4</sub> at a starting OD<sub>600</sub> of 0.05 and grown to mid-  
483 log phase (OD<sub>600</sub> = 0.3-0.4) at 37 °C in the presence of 5% CO<sub>2</sub>. Cells were washed by centrifugation  
484 6 times in PBS with 5 mM EDTA, harvested, and desiccated at 95 °C for 18 hrs. Metal ion content was  
485 released by treatment with 500  $\mu$ L of 35% HNO<sub>3</sub> at 95 °C for 60 min. Metal content was analysed on  
486 an Agilent 8900 QQQ ICP-MS<sup>51</sup>.

487

#### 488 **Isothermal titration calorimetry (ITC)**

489 Purified OppA was dialyzed overnight against 50 mM Tris-HCl, pH=7.4; 50 mM KCl. ITC  
490 experiments were carried by microcalorimetry on a ITC200 calorimeter (MicroCal). The peptide  
491 (RPPGFSFR) stock solution (200  $\mu$ M) was prepared in the dialysis buffer and was stepwise injected (2  
492  $\mu$ l) into the reaction cell containing 20  $\mu$ M OppA. All experiments were carried out at 25°C with a  
493 mixing rate of 400 rpm. Data were analysed with a one site-binding model using, provided by the  
494 MicroCal software (MicroCal).

495

#### 496 **Protein labelling for FRET measurements**

497 Surface-exposed and non-conserved positions were chosen for Cys engineering and subsequent  
498 labelling, based on X-ray crystal structures of OpuAC (3L6G, 3L6H), SBD1 (4AL9), SBD2 (4KR5,  
499 4KQP), PsaA (3ZK7, 1PSZ), OppA (3FTO, 3RYA) and MalE (1OMP, 1ANF). The proteins used in  
500 smFRET experiments were OpuAC(V360C/V423C), SBD1(T159C/G87C), SBD2(T369C/S451C),

501 PsaA(V76C/K237C), PsaA(V76C/K237C/D280N), PsaA(E74C/K237C), OppA(A209C/S441C),  
502 MalE(T36C/S352C), MalE(T36C/N205C), MalE(K34C/R354C), MalE(T36C/S352C/A96W/I329W)  
503 and MalE(K34C/R354C/A96W/I329W). Unlabelled protein derivatives (20-40 mg/ml) were stored  
504 at  $-20^{\circ}\text{C}$  in the appropriate buffer (50 mM Tris-HCl, pH 7.4; 50 mM KCl; 50% glycerol for MalE  
505 and OppA; 25 mM Tris-HCl, pH 8.0; 150 mM NaCl; 1  $\mu\text{M}$  EDTA; 50% glycerol for PsaA; 50 mM  
506 KPi, pH 7.4; 50 mM KCl; 50% glycerol for OpuAC, SBD1 and SBD2) supplemented by 1 mM  
507 Dithiothreitol (DTT, Sigma-Aldrich).

508 Stochastic labelling was performed with the maleimide derivative of dyes Cy3B (GE  
509 Healthcare) and ATTO647N (ATTO-TEC) for OpuAC and MalE; SBD1, SBD2, OppA and PsaA  
510 were labelled with Alexa555 and Alexa647 (ThermoFisher). The purified proteins were first treated  
511 with 10 mM DTT for 30 min to fully reduce oxidized cysteines. After dilution of the protein sample  
512 to a DTT concentration of 1 mM the reduced protein were immobilized on a  $\text{Ni}^{2+}$ -Sephacryl resin  
513 (GE Healthcare) and washed with ten column volumes of buffer A (50 mM Tris-HCl, pH 7.4; 50 mM  
514 KCl for MalE and OppA; 25 mM Tris-HCl, pH 8.0; 150 mM NaCl; 1  $\mu\text{M}$  EDTA for PsaA; 50 mM  
515 KPi, pH 7.4; 50 mM KCl for OpuAC, SBD1 and SBD2) to remove the DTT. To make sure that no  
516 endogenous ligand was left, for some experiments, and prior to removing the DTT, we unfolded  
517 the immobilized-SBPs by treatment with 6 M of urea supplemented with 1 mM DTT and refolded  
518 them again by washing with buffer A. The resin was incubated 1-8 hrs at  $4^{\circ}\text{C}$  with the dyes  
519 dissolved in buffer A. To ensure a high labelling efficiency, the dye concentration was ~20-times  
520 higher than the protein concentration. Subsequently, unbound dyes were removed by washing the  
521 column with at least twenty column volumes of buffer A. Elution of the proteins was done by  
522 supplementing buffer A with 400 mM Imidazole (Sigma-Aldrich). The labelled proteins were further  
523 purified by size-exclusion chromatography (Superdex 200, GE Healthcare) using buffer A. Sample  
524 composition was assessed by recording the absorbance at 280 nm (protein), 559 nm (donor), and  
525 645 nm (acceptor) to estimate labelling efficiency. For all proteins the labelling efficiency was  $>90\%$ .

526

## 527 **Fluorescence Anisotropy**

528 To verify that the measurements of apparent FRET efficiency report on inter-probe distances between  
529 the donor and acceptor fluorophores, at least one of the fluorophores must be able to rotate freely. To

530 investigate this, we determined the anisotropy values of labelled proteins. The fluorescence intensity  
531 was measured on a scanning spectrofluorometer (Jasco FP-8300; 10 nm excitation and emission  
532 bandwidth; 8 s integration time) around the emission maxima of the fluorophores (for donor,  $\lambda_{\text{ex}} = 535$   
533 nm and  $\lambda_{\text{em}} = 580$  nm; for acceptor,  $\lambda_{\text{ex}} = 635$  nm and  $\lambda_{\text{em}} = 660$  nm). Anisotropy values  $r$  were  
534 obtained from  $r = (I_{VV} - GI_{VH}) / (I_{VV} + 2GI_{VH})$ , where  $I_{VV}$  and  $I_{VH}$  are the fluorescence emission  
535 intensities in the vertical and horizontal orientation, respectively, upon excitation along the vertical  
536 orientation. The sensitivity of the spectrometer to different polarizations was corrected via the factor  
537  $G = I_{HV} / I_{HH}$ , where  $I_{HV}$  and  $I_{HH}$  are the fluorescence emission intensities in the vertical and  
538 horizontal orientation, respectively, upon excitation along the horizontal orientation.  $G$ -values were  
539 determined to be 1.8-1.9. The anisotropy was measured in buffer A and the labelled proteins and free-  
540 fluorophores in a concentration range of 50–500 nM at room temperature.

541

#### 542 **Solution-based smFRET and ALEX**

543 Solution-based smFRET and alternating laser excitation (ALEX)<sup>49</sup> experiments were carried out at 25-  
544 100 pM of labelled protein at room temperature in the appropriate buffer (50 mM Tris-HCl, pH 7.4; 50  
545 mM KCl for MalE and OppA; 25 mM Tris-HCl, pH 8.0; 150 mM NaCl; 1  $\mu$ M EDTA for PsaA; 50  
546 mM KPi, pH 7.4; 50 mM KCl for OpuAC, SBD1 and SBD2) supplemented with additional reagents  
547 as stated in the text. Microscope cover slides (no. 1.5H precision cover slides, VWR Marienfeld) were  
548 coated with 1 mg/mL BSA for 30-60 s to prevent fluorophore and/or protein interactions with the glass  
549 material. Excess BSA was subsequently removed by washing and exchange with appropriate buffer  
550 (50 mM Tris-HCl, pH 7.4; 50 mM KCl for MalE and OppA; 25 mM Tris-HCl, pH 8.0; 150 mM NaCl;  
551 1  $\mu$ M EDTA for PsaA; 50 mM KPi, pH 7.4; 50 mM KCl for OpuAC, SBD1, SBD2).

552 All smFRET experiments were performed using a home-built confocal microscope. In brief,  
553 two laser-diodes (Coherent Obis) with emission wavelength of 532 and 637 nm were directly  
554 modulated for alternating periods of 50  $\mu$ s and used for confocal excitation. The laser beams were  
555 coupled into a single-mode fiber (PM-S405-XP, Thorlabs) and collimated (MB06, Q-Optics/Linos)  
556 before entering a water immersion objective (60X, NA 1.2, UPlanSAPO 60XO, Olympus). The  
557 fluorescence was collected by excitation at a depth of 20  $\mu$ m. Average laser powers were 30  $\mu$ W at  
558 532 nm ( $\sim 30$  kW/cm<sup>2</sup>) and 15  $\mu$ W at 637 nm ( $\sim 15$  kW/cm<sup>2</sup>). Excitation and emission light was

559 separated by a dichroic beam splitter (zt532/642rpc, AHF Analysentechnik), which is mounted in an  
560 inverse microscope body (IX71, Olympus). Emitted light was focused onto a 50  $\mu\text{m}$  pinhole and  
561 spectrally separated (640DCXR, AHF Analysentechnik) onto two single-photon avalanche diodes  
562 (TAU-SPADs-100, Picoquant) with appropriate spectral filtering (donor channel: HC582/75; acceptor  
563 channel: Edge Basic 647LP; AHF Analysentechnik). Photon arrival times in each detection channel  
564 were registered by an NI-Card (PXI-6602, National Instruments) and processed using custom software  
565 implemented in LabView (National Instruments).

566 An individual labelled protein diffusing through the confocal volume generates a burst of  
567 photons. To identify fluorescence bursts a dual-colour burst search<sup>67</sup> was used with parameters  $M =$   
568  $15$ ,  $T = 500 \mu\text{s}$  and  $L = 25$ . In brief, a fluorescent signal is considered a burst, when a total of  $L$   
569 photons having  $M$  neighbouring photons within a time window of length  $T$  centred on their own  
570 arrival time. A first burst search was done that includes the donor and acceptor photons detected  
571 during the donor excitation, and a second burst search was done including only the acceptor photons  
572 detected during the acceptor excitation. The two separate burst searches were combined to define  
573 intervals when both donor and acceptor fluorophores are active. These intervals define the bursts. Only  
574 bursts having  $>150$  photons were further analysed

575 The three relevant photon streams were analysed (DA, donor-based acceptor emission; DD,  
576 donor-based donor emission; AA, acceptor-based acceptor emission) and assignment is based on the  
577 excitation period and detection channel<sup>49</sup>. The apparent FRET efficiency is calculated via  
578  $F(\text{DA})/[F(\text{DA})+F(\text{DD})]$  and the Stoichiometry  $S$  by  $[F(\text{DD})+F(\text{DA})]/[(F(\text{DD})+F(\text{DA})+F(\text{AA}))]$ , where  
579  $F(\cdot)$  denotes the summing over all photons within the burst<sup>49</sup>.

580 Binning the detected bursts into a 2D apparent FRET/ $S$  histogram (81 x 81 bins) allowed the  
581 selection of the donor and acceptor labelled molecules and reduce artefacts arising from fluorophore  
582 bleaching<sup>49</sup>. The selected apparent FRET histogram were fitted with a Gaussian distribution using  
583 nonlinear least square, to obtain a 95% Wald confidence interval for the distribution mean.  
584 Significance statements about the mean of the FRET distributions were made by comparing  
585 appropriate confidence intervals.

586

587 **Scanning confocal microscopy**

588 Confocal scanning experiments were performed at room temperature and using a home-built confocal  
589 scanning microscope as described previously<sup>29, 68, 69</sup>. In brief, surface scanning was performed using a  
590 XYZ-piezo stage with 100×100×20 μm range (P-517-3CD with E-725.3CDA, Physik Instrumente).  
591 The detector signal was registered using a Hydra Harp 400 picosecond event timer and a module for  
592 time-correlated single photon counting (both Picoquant). Data were recorded with constant 532 nm  
593 excitation at an intensity of 0.5 μW (~125 W/cm<sup>2</sup>) for SBD2, PsaA, OppA and MalE, but 1.5 μW  
594 (~400 W/cm<sup>2</sup>) for OpuAC, unless stated otherwise. Scanning images of 10×10 μm were recorded with  
595 50 nm step size and 2 ms integration time at each pixel. After each surface scan, the positions of  
596 labelled proteins were identified manually; the position information was used to subsequently generate  
597 time traces. Surface immobilization was conducted using an anti-HIS antibody and established  
598 surface-chemistry protocols as described<sup>29</sup>. A flow-cell arrangement was used as described before<sup>29, 70</sup>  
599 for studies of surface-tethered proteins, except for MalE. MalE was studied on standard functionalized  
600 cover-slides since MalE was extremely sensitive to contaminations of maltodextrins in double-sided  
601 tape or other flow-cell parts. All experiments of OpuAC and PsaA were carried out in degassed  
602 buffers (50 mM KPi pH 7.4, 50 mM KCl for OpuAC and 25 mM Tris-HCl pH 8.0, 150 mM NaCl, 1  
603 μM EDTA for PsaA) under oxygen-free conditions obtained utilizing an oxygen-scavenging system  
604 supplemented with 10 mM of Trolox (Merck)<sup>71</sup>. For MalE, SBD1, SBD2 and OppA experiments were  
605 carried out in buffer (50 mM KPi, pH 7.4, 50 mM KCl for SBD2 and 50 mM Tris-HCl, pH 7.4, 50  
606 mM KCl for MalE and OppA) supplemented with 1 mM Trolox and 10 mM Cysteamine (Merck).

607

### 608 **Analysis of fluorescence trajectories**

609 Time-traces were analysed by integrating the detected red and green photon streams in time-bins as  
610 stated throughout the text. Only traces lasting longer than 50 time-bins, having on average more than  
611 10 photons per time-bin that showed clear bleaching steps, were used for further analysis. The number  
612 of analysed molecules, transitions and the total observation time are indicated in Table 4. The apparent  
613 FRET per time-bin was calculated by dividing the red photons by the total number of photons per  
614 time-bin. The state-trajectory of the FRET time-trace was modelled by a Hidden Markov Model  
615 (HMM)<sup>72</sup>. For this an implementation of HMM was programmed in Matlab (MathWorks), based on  
616 the work of Rabiner<sup>72</sup>. In the analysis, we assumed that the FRET time-trace (the observation

617 sequence) can be considered as a HMM with two states having a one-dimensional Gaussian-output  
618 distribution. The Gaussian output-distribution of state  $i$  ( $i = 1, 2$ ) was completely defined by the mean  
619 and the variance. The goal was to find the parameters  $\lambda$  (transition probabilities that connect the states  
620 and parameters of output-distribution), given only the observation sequence that maximizes the  
621 likelihood function. This was iteratively done using the Baum-Welch algorithm<sup>73</sup>. Care was taken to  
622 avoid floating point underflow and was done as described<sup>72</sup>. With the inferred parameters  $\lambda$ , the most  
623 probable state-trajectory is then found using the Viterbi algorithm<sup>74</sup>. The time spent in each state  
624 (open, closed) was inferred from the most probable state-trajectory, an histogram was made and the  
625 mean time spent in each state was calculated.

626

### 627 **Ensemble FRET**

628 Fluorescence spectra of labelled SBD1 and SBD2 proteins were measured on a scanning  
629 spectrofluorometer (Jasco FP-8300;  $\lambda_{\text{ex}} = 552$  nm, 5 nm excitation and emission bandwidth; 3 s  
630 integration time). The apparent FRET efficiency was calculated via  $I_{\text{Acceptor}} / (I_{\text{Acceptor}} + I_{\text{donor}})$ , where  
631  $I_{\text{Acceptor}}$  and  $I_{\text{donor}}$  are fluorescence intensities around the emission maxima of the acceptor (660 nm) and  
632 donor fluorophore (600 nm), respectively. Measurements were performed at 20°C with ~200 nM  
633 labelled protein dissolved in buffer A.

634 **ACKNOWLEDGEMENTS**

635 This work was financed by an NWO Veni grant (722.012.012 to G.G.), an ERC Advanced Grant (No.  
636 670578 – ABCvolume to B.P.), the National Health and Medical Research Council (Project Grants  
637 1080784 and 1122582 to C.A.M), the Australian Research Council (Discovery Project DP170102102  
638 and Future Fellowship FT170100006 to C.A.M.) and an ERC Starting Grant (No. 638536 – SM-  
639 IMPORT to T.C.). G.G. also acknowledges an EMBO fellowship (long-term fellowship ALF 47-2012  
640 to G.G.) and financial support by the Zernike Institute for Advanced Materials. G.G. is a Rega  
641 foundation post-Doctoral fellow. T.C. was further supported by the Center of Nanoscience Munich  
642 (CeNS), Deutsche Forschungsgemeinschaft within GRK2062/1 (project C03) and SFB863 (project  
643 A13), LMUexcellent and the Center for integrated protein science Munich (CiPSM). We thank H.  
644 Jung, D. Griffith and M. Wiertsema for reading of the manuscript.

645

646 **AUTHOR CONTRIBUTIONS**

647 M.d.B., G.G., B.P., C.A.M. and T.C. designed the study. B.P., C.A.M. and T.C. supervised the project.  
648 M.d.B., G.G., R.V. and F.H. performed the molecular biology and protein chemistry studies and  
649 developed the labeling protocols. M.d.B., G.G., R.V., F.H., and N.E. performed single-molecule  
650 experiments. G.K.S. performed transport assays and ITC. M.d.B. analysed smFRET data. S.L.B. and  
651 C.A.M. designed and executed the PsaA biochemical studies. All authors contributed to discussion of  
652 the research and writing of the manuscript.

653

654 **AUTHOR INFORMATION**

655 The authors declare no competing financial interest. Correspondence and requests for material should  
656 be addressed to B.P. ([b.poolman@rug.nl](mailto:b.poolman@rug.nl)), C.A.M. ([christopher.mcdevitt@unimelb.edu.au](mailto:christopher.mcdevitt@unimelb.edu.au)) and T.C.  
657 ([cordes@bio.lmu.de](mailto:cordes@bio.lmu.de)).



658

## REFERENCES

- 659 1. Higgins, C. F. ABC transporters: from microorganisms to man. *Annu. Rev. Cell Biol.* **8**, 67-113  
660 (1992).
- 661 2. Berntsson, R. P., Smits, S. H., Schmitt, L., Slotboom, D. J. & Poolman, B. A structural  
662 classification of substrate-binding proteins. *FEBS Lett.* **584**, 2606-2617 (2010).
- 663 3. Scheepers, G. H., Lycklama A Nijeholt, J. A. & Poolman, B. An updated structural classification of  
664 substrate-binding proteins. *FEBS Lett.* **590**, 4393-4401 (2016).
- 665 4. van der Heide, T. & Poolman, B. ABC transporters: one, two or four extracytoplasmic substrate-  
666 binding sites? *EMBO Rep.* **3**, 938-943 (2002).
- 667 5. Locher, K. P. Mechanistic diversity in ATP-binding cassette (ABC) transporters. *Nat. Struct. Mol.*  
668 *Biol.* **23**, 487-493 (2016).
- 669 6. Swier, L. J. Y. M., Slotboom, D. J. & Poolman, B. in *ABC transporters - 40 years on* (ed George,  
670 A. M.) 3-36 (Springer International Publishing, 2016).
- 671 7. Davidson, A. L., Dassa, E., Orelle, C. & Chen, J. Structure, function, and evolution of bacterial  
672 ATP-binding cassette systems. *Microbiol. Mol. Biol. Rev.* **72**, 317-64, table of contents (2008).
- 673 8. Shilton, B. H., Flocco, M. M., Nilsson, M. & Mowbray, S. L. Conformational changes of three  
674 periplasmic receptors for bacterial chemotaxis and transport: the maltose-, glucose/galactose- and  
675 ribose-binding proteins. *J. Mol. Biol.* **264**, 350-363 (1996).
- 676 9. Quioco, F. A. & Ledvina, P. S. Atomic structure and specificity of bacterial periplasmic receptors  
677 for active transport and chemotaxis: variation of common themes. *Mol. Microbiol.* **20**, 17-25 (1996).
- 678 10. Karpowich, N. K., Huang, H. H., Smith, P. C. & Hunt, J. F. Crystal structures of the BtuF  
679 periplasmic-binding protein for vitamin B12 suggest a functionally important reduction in protein  
680 mobility upon ligand binding. *J. Biol. Chem.* **278**, 8429-8434 (2003).
- 681 11. Trakhanov, S. *et al.* Ligand-free and -bound structures of the binding protein (LivJ) of the  
682 Escherichia coli ABC leucine/isoleucine/valine transport system: trajectory and dynamics of the  
683 interdomain rotation and ligand specificity. *Biochemistry* **44**, 6597-6608 (2005).
- 684 12. Nishitani, Y. *et al.* Recognition of heteropolysaccharide alginate by periplasmic solute-binding  
685 proteins of a bacterial ABC transporter. *Biochemistry* **51**, 3622-3633 (2012).
- 686 13. Pandey, S., Modak, A., Phale, P. S. & Bhaumik, P. High Resolution Structures of Periplasmic  
687 Glucose-binding Protein of Pseudomonas putida CSV86 Reveal Structural Basis of Its Substrate  
688 Specificity. *J. Biol. Chem.* **291**, 7844-7857 (2016).
- 689 14. Magnusson, U., Salopek-Sondi, B., Luck, L. A. & Mowbray, S. L. X-ray structures of the leucine-  
690 binding protein illustrate conformational changes and the basis of ligand specificity. *J. Biol. Chem.*  
691 **279**, 8747-8752 (2004).
- 692 15. Quioco, F. A., Spurlino, J. C. & Rodseth, L. E. Extensive features of tight oligosaccharide  
693 binding revealed in high-resolution structures of the maltodextrin transport/chemosensory receptor.  
694 *Structure* **5**, 997-1015 (1997).

- 695 16. Hall, J. A., Ganesan, A. K., Chen, J. & Nikaido, H. Two modes of ligand binding in maltose-  
696 binding protein of Escherichia coli. Functional significance in active transport. *J. Biol. Chem.* **272**,  
697 17615-17622 (1997).
- 698 17. Hall, J. A., Thorgeirsson, T. E., Liu, J., Shin, Y. K. & Nikaido, H. Two modes of ligand binding in  
699 maltose-binding protein of Escherichia coli. Electron paramagnetic resonance study of ligand-induced  
700 global conformational changes by site-directed spin labeling. *J. Biol. Chem.* **272**, 17610-17614 (1997).
- 701 18. Sharff, A. J., Rodseth, L. E. & Quioco, F. A. Refined 1.8-Å structure reveals the mode of binding  
702 of beta-cyclodextrin to the maltodextrin binding protein. *Biochemistry* **32**, 10553-10559 (1993).
- 703 19. Skrynnikov, N. R. *et al.* Orienting domains in proteins using dipolar couplings measured by liquid-  
704 state NMR: differences in solution and crystal forms of maltodextrin binding protein loaded with beta-  
705 cyclodextrin. *J. Mol. Biol.* **295**, 1265-1273 (2000).
- 706 20. Oldham, M. L., Chen, S. & Chen, J. Structural basis for substrate specificity in the Escherichia coli  
707 maltose transport system. *Proc. Natl. Acad. Sci. U. S. A.* **110**, 18132-18137 (2013).
- 708 21. Yu, J., Ge, J., Heuveling, J., Schneider, E. & Yang, M. Structural basis for substrate specificity of  
709 an amino acid ABC transporter. *Proc. Natl. Acad. Sci. U. S. A.* **112**, 5243-5248 (2015).
- 710 22. Woo, J. S., Zeltina, A., Goetz, B. A. & Locher, K. P. X-ray structure of the Yersinia pestis heme  
711 transporter HmuUV. *Nat. Struct. Mol. Biol.* **19**, 1310-1315 (2012).
- 712 23. Pinkett, H. W., Lee, A. T., Lum, P., Locher, K. P. & Rees, D. C. An inward-facing conformation  
713 of a putative metal-chelate-type ABC transporter. *Science* **315**, 373-377 (2007).
- 714 24. Locher, K. P., Lee, A. T. & Rees, D. C. The E. coli BtuCD structure: a framework for ABC  
715 transporter architecture and mechanism. *Science* **296**, 1091-1098 (2002).
- 716 25. Flocco, M. M. & Mowbray, S. L. The 1.9 Å x-ray structure of a closed unliganded form of the  
717 periplasmic glucose/galactose receptor from Salmonella typhimurium. *J. Biol. Chem.* **269**, 8931-8936  
718 (1994).
- 719 26. Oswald, C. *et al.* Crystal structures of the choline/acetylcholine substrate-binding protein ChoX  
720 from Sinorhizobium meliloti in the liganded and unliganded-closed states. *J. Biol. Chem.* **283**, 32848-  
721 32859 (2008).
- 722 27. Tang, C., Schwieters, C. D. & Clore, G. M. Open-to-closed transition in apo maltose-binding  
723 protein observed by paramagnetic NMR. *Nature* **449**, 1078-1082 (2007).
- 724 28. Feng, Y. *et al.* Conformational Dynamics of apo-GlnBP Revealed by Experimental and  
725 Computational Analysis. *Angew. Chem. Int. Ed Engl.* **55**, 13990-13994 (2016).
- 726 29. Gouridis, G. *et al.* Conformational dynamics in substrate-binding domains influences transport in  
727 the ABC importer GlnPQ. *Nat. Struct. Mol. Biol.* **22**, 57-64 (2015).
- 728 30. Duan, X. & Quioco, F. A. Structural evidence for a dominant role of nonpolar interactions in the  
729 binding of a transport/chemosensory receptor to its highly polar ligands. *Biochemistry* **41**, 706-712  
730 (2002).

- 731 31. Sooriyaarachchi, S., Ubhayasekera, W., Park, C. & Mowbray, S. L. Conformational changes and  
732 ligand recognition of Escherichia coli D-xylose binding protein revealed. *J. Mol. Biol.* **402**, 657-668  
733 (2010).
- 734 32. Kim, E. *et al.* A single-molecule dissection of ligand binding to a protein with intrinsic dynamics.  
735 *Nat. Chem. Biol.* **9**, 313-318 (2013).
- 736 33. Seo, M. H., Park, J., Kim, E., Hohng, S. & Kim, H. S. Protein conformational dynamics dictate the  
737 binding affinity for a ligand. *Nat. Commun.* **5**, 3724 (2014).
- 738 34. Husada, F. *et al.* Watching conformational dynamics of ABC transporters with single-molecule  
739 tools. *Biochem. Soc. Trans.* **43**, 1041-1047 (2015).
- 740 35. Lerner, E. *et al.* Toward dynamic structural biology: Two decades of single-molecule Forster  
741 resonance energy transfer. *Science* **359**, 10.1126/science.aan1133 (2018).
- 742 36. Ha, T. *et al.* Probing the interaction between two single molecules: fluorescence resonance energy  
743 transfer between a single donor and a single acceptor. *Proc. Natl. Acad. Sci. U. S. A.* **93**, 6264-6268  
744 (1996).
- 745 37. Fulyani, F., Schuurman-Wolters, G. K., Slotboom, D. J. & Poolman, B. Relative Rates of Amino  
746 Acid Import via the ABC Transporter GlnPQ Determine the Growth Performance of Lactococcus  
747 lactis. *J. Bacteriol.* **198**, 477-485 (2015).
- 748 38. Wolters, J. C. *et al.* Ligand binding and crystal structures of the substrate-binding domain of the  
749 ABC transporter OpuA. *PLoS One* **5**, e10361 (2010).
- 750 39. Ferenci, T. The recognition of maltodextrins by Escherichia coli. *Eur. J. Biochem.* **108**, 631-636  
751 (1980).
- 752 40. McDevitt, C. A. *et al.* A molecular mechanism for bacterial susceptibility to zinc. *PLoS Pathog.* **7**,  
753 e1002357 (2011).
- 754 41. Berntsson, R. P., Thunnissen, A. M., Poolman, B. & Slotboom, D. J. Importance of a hydrophobic  
755 pocket for peptide binding in lactococcal OppA. *J. Bacteriol.* **193**, 4254-4256 (2011).
- 756 42. Ferenci, T., Muir, M., Lee, K. S. & Maris, D. Substrate specificity of the Escherichia coli  
757 maltodextrin transport system and its component proteins. *Biochim. Biophys. Acta* **860**, 44-50 (1986).
- 758 43. Doeven, M. K., Abele, R., Tampe, R. & Poolman, B. The binding specificity of OppA determines  
759 the selectivity of the oligopeptide ATP-binding cassette transporter. *J. Biol. Chem.* **279**, 32301-32307  
760 (2004).
- 761 44. Oldham, M. L. & Chen, J. Crystal structure of the maltose transporter in a pretranslocation  
762 intermediate state. *Science* **332**, 1202-1205 (2011).
- 763 45. Hor, L. I. & Shuman, H. A. Genetic analysis of periplasmic binding protein dependent transport in  
764 Escherichia coli. Each lobe of maltose-binding protein interacts with a different subunit of the  
765 MalFGK2 membrane transport complex. *J. Mol. Biol.* **233**, 659-670 (1993).
- 766 46. Doeven, M. K., van den Bogaart, G., Krasnikov, V. & Poolman, B. Probing receptor-translocator  
767 interactions in the oligopeptide ABC transporter by fluorescence correlation spectroscopy. *Biophys. J.*  
768 **94**, 3956-3965 (2008).

- 769 47. Hollenstein, K., Frei, D. C. & Locher, K. P. Structure of an ABC transporter in complex with its  
770 binding protein. *Nature* **446**, 213-216 (2007).
- 771 48. Davidson, A. L., Shuman, H. A. & Nikaido, H. Mechanism of maltose transport in *Escherichia*  
772 *coli*: transmembrane signaling by periplasmic binding proteins. *Proc. Natl. Acad. Sci. U. S. A.* **89**,  
773 2360-2364 (1992).
- 774 49. Kapanidis, A. N. *et al.* Fluorescence-aided molecule sorting: analysis of structure and interactions  
775 by alternating-laser excitation of single molecules. *Proc. Natl. Acad. Sci. U. S. A.* **101**, 8936-8941  
776 (2004).
- 777 50. Lawrence, M. C. *et al.* The crystal structure of pneumococcal surface antigen PsaA reveals a  
778 metal-binding site and a novel structure for a putative ABC-type binding protein. *Structure* **6**, 1553-  
779 1561 (1998).
- 780 51. Counago, R. M. *et al.* Imperfect coordination chemistry facilitates metal ion release in the Psa  
781 permease. *Nat. Chem. Biol.* **10**, 35-41 (2014).
- 782 52. Begg, S. L. *et al.* Dysregulation of transition metal ion homeostasis is the molecular basis for  
783 cadmium toxicity in *Streptococcus pneumoniae*. *Nat. Commun.* **6**, 6418 (2015).
- 784 53. Gould, A. D., Telmer, P. G. & Shilton, B. H. Stimulation of the maltose transporter ATPase by  
785 unliganded maltose binding protein. *Biochemistry* **48**, 8051-8061 (2009).
- 786 54. Bao, H. & Duong, F. Discovery of an auto-regulation mechanism for the maltose ABC transporter  
787 MalFGK2. *PLoS One* **7**, e34836 (2012).
- 788 55. Schuurman-Wolters, G. K., de Boer, M., Pietrzyk, M. K. & Poolman, B. Protein Linkers Provide  
789 Limits on the Domain Interactions in the ABC Importer GlnPQ and Determine the Rate of Transport.  
790 *J. Mol. Biol.* **430**, 1249-1262 (2018).
- 791 56. Speiser, D. M. & Ames, G. F. *Salmonella typhimurium* histidine periplasmic permease mutations  
792 that allow transport in the absence of histidine-binding proteins. *J. Bacteriol.* **173**, 1444-1451 (1991).
- 793 57. Shevelev, I. V. & Hubscher, U. The 3' 5' exonucleases. *Nat. Rev. Mol. Cell Biol.* **3**, 364-376  
794 (2002).
- 795 58. Kotik-Kogan, O., Moor, N., Tworowski, D. & Safro, M. Structural basis for discrimination of L-  
796 phenylalanine from L-tyrosine by phenylalanyl-tRNA synthetase. *Structure* **13**, 1799-1807 (2005).
- 797 59. Schmidt, A. *et al.* The quantitative and condition-dependent *Escherichia coli* proteome. *Nat.*  
798 *Biotechnol.* **34**, 104-110 (2016).
- 799 60. Lycklama A Nijeholt, J. A., Vietrov, R., Schuurman-Wolters, G. K. & Poolman, B. Energy  
800 Coupling Efficiency in the Type I ABC Transporter GlnPQ. *J. Mol. Biol.* **430**, 853-866 (2018).
- 801 61. Borths, E. L., Poolman, B., Hvorup, R. N., Locher, K. P. & Rees, D. C. In vitro functional  
802 characterization of BtuCD-F, the *Escherichia coli* ABC transporter for vitamin B12 uptake.  
803 *Biochemistry* **44**, 16301-16309 (2005).
- 804 62. Bok, J. W. & Keller, N. P. Fast and easy method for construction of plasmid vectors using  
805 modified quick-change mutagenesis. *Methods Mol. Biol.* **944**, 163-174 (2012).

- 806 63. Vander Kooi, C. W. Megaprimer method for mutagenesis of DNA. *Methods Enzymol.* **529**, 259-  
807 269 (2013).
- 808 64. Geertsma, E. R., Nik Mahmood, N. A., Schuurman-Wolters, G. K. & Poolman, B. Membrane  
809 reconstitution of ABC transporters and assays of translocator function. *Nat. Protoc.* **3**, 256-266 (2008).
- 810 65. Sung, C. K., Li, H., Claverys, J. P. & Morrison, D. A. An rpsL cassette, janus, for gene  
811 replacement through negative selection in *Streptococcus pneumoniae*. *Appl. Environ. Microbiol.* **67**,  
812 5190-5196 (2001).
- 813 66. Plumptre, C. D. *et al.* AdcA and AdcAII employ distinct zinc acquisition mechanisms and  
814 contribute additively to zinc homeostasis in *Streptococcus pneumoniae*. *Mol. Microbiol.* **91**, 834-851  
815 (2014).
- 816 67. Nir, E. *et al.* Shot-noise limited single-molecule FRET histograms: comparison between theory  
817 and experiments. *J Phys Chem B* **110**, 22103-22124 (2006).
- 818 68. Husada, F. *et al.* Conformational dynamics of the ABC transporter McjD seen by single-molecule  
819 FRET. *EMBO J.* **37**, 10.15252/embj.2018100056. Epub 2018 Sep 20 (2018).
- 820 69. Jazi, A. A. *et al.* Caging and Photoactivation in Single-Molecule Forster Resonance Energy  
821 Transfer Experiments. *Biochemistry* **56**, 2031-2041 (2017).
- 822 70. Roy, R., Hohng, S. & Ha, T. A practical guide to single-molecule FRET. *Nat. Methods* **5**, 507-516  
823 (2008).
- 824 71. van der Velde, J. H. *et al.* A simple and versatile design concept for fluorophore derivatives with  
825 intramolecular photostabilization. *Nat. Commun.* **7**, 10144 (2016).
- 826 72. RABINER FELLOW, I., LAWRENCE R. in *Readings in Speech Recognition* (eds Waibel, A., , &  
827 Lee, K.) 267-296 (Morgan Kaufmann, San Francisco, 1990).
- 828 73. Baum, L. E. & Petrie, T. Statistical inference for probabilistic functions of finite state Markov  
829 chains. *Annals of Mathematical Statistics* **37**, 1554-1563 (1966).
- 830 74. Viterbi, A. J. Error Bounds for Convolutional Codes and an Asymptotically Optimum Decoding  
831 Algorithm. *IEEE Trans. Inf. Theory* **IT-13**, 260-269 (1967).

832

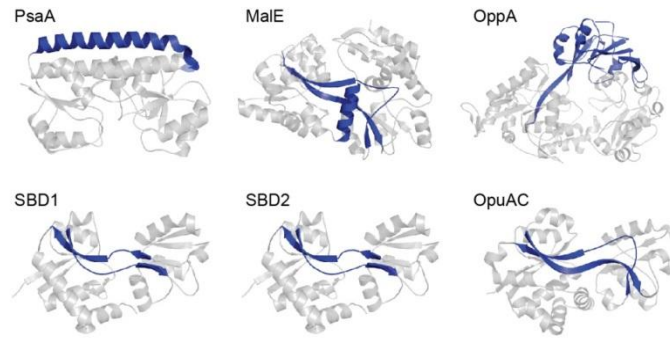

833

834 **Figure 1. Representative SBPs from different structural clusters, categorized by their hinge**  
835 **region.** X-ray crystal structures of PsaA (3ZK7; cluster A), MalE (1OMP; cluster B), OppA (3FTO;  
836 cluster C), OpuAC (3L6G; cluster F), SBD1 (4LA9; cluster F) and SBD2 (4KR5; cluster F) are all  
837 shown in the open ligand-free conformation. Hinge regions are shown in blue and the two rigid lobes  
838 in grey. For classification of the proteins in clusters see Berntsson *et al* and Scheepers *et al*<sup>2,3</sup>.

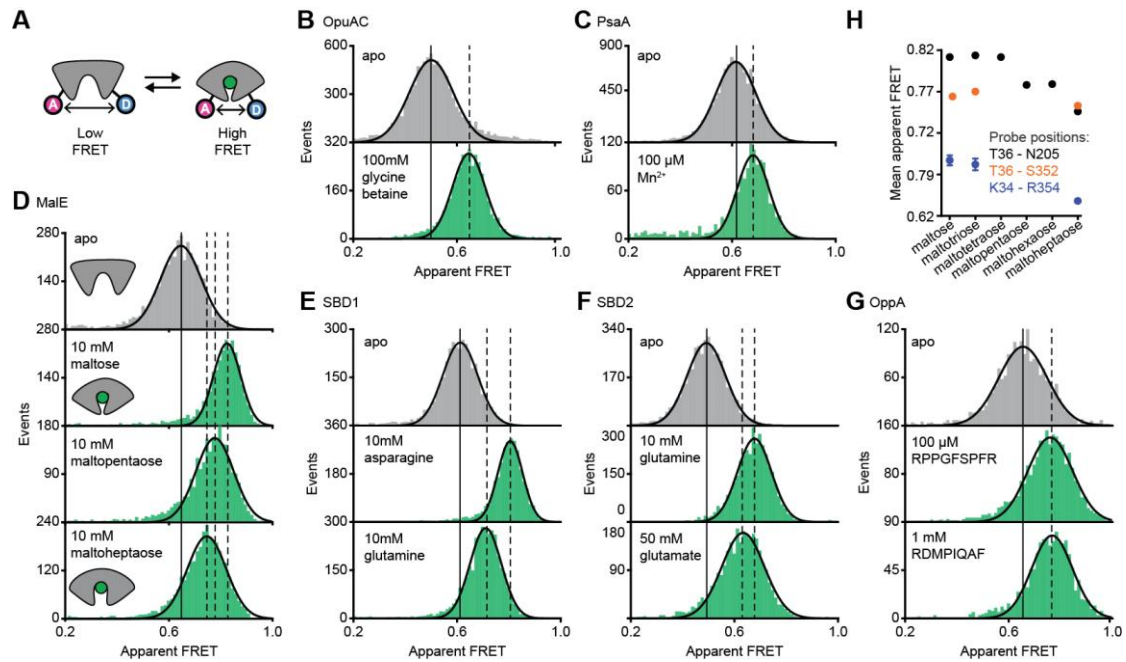

839

840 **Figure 2. Conformational states of SBPs probed by smFRET reveal multiple active**  
 841 **conformations.** (A) Experimental strategy to study SBP conformational changes via FRET. Solution-  
 842 based apparent FRET efficiency histograms of OpuAC(V360C/N423C) (B), PsaA(V76C/K237C) (C),  
 843 MalE(T36C/S352C) (D), SBD1(T159C/G87C) (E), SBD2(T369C/S451) (F) and  
 844 OppA(A209C/S441C) (G) in the absence (grey bars) and presence of different cognate substrates  
 845 (green bars). The OppA substrates are indicated by one-letter amino acid code. Bars are experimental  
 846 data and the solid line a Gaussian distribution fit. The 95% confidence interval of the Gaussian  
 847 distribution mean is shown in Table 3, and the interval centre is indicated by vertical lines (solid and  
 848 dashed). (H) Mean of the Gaussian distribution of MalE labelled at T36/S352 (black), T36/N205  
 849 (green) or K34/R352 (orange). Error bars indicate 95% confidence interval of the mean.

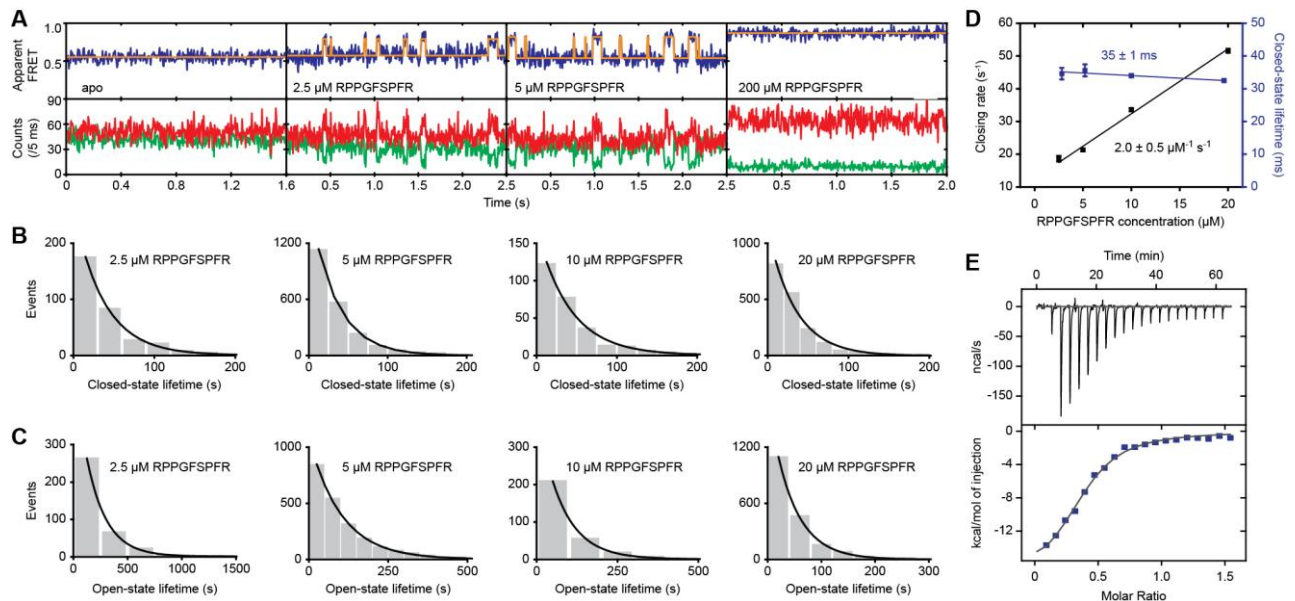

850

851 **Figure 2 – figure supplements 1. OppA uses an induced-fit ligand binding mechanism. (A)**

852 Representative fluorescence trajectories of OppA(A209C/S441C) at different peptide (RPPGFSPFR)

853 concentrations; donor (green) and acceptor (red) photon counts. The top panel shows the calculated

854 apparent FRET efficiency (blue) with the most probable state-trajectory of the Hidden Markov Model

855 (HMM) (orange). Dwell time histogram of the low FRET (closed conformation) (B) and high FRET

856 state (open conformation) (C) as obtained from the most probable state-trajectory of the HMM of all

857 molecules per condition. Grey bars are the binned data and the solid line is an exponential fit. Total

858 number of analysed molecules are indicated in Table 4. (D) Closing rate (rate of low to high FRET

859 state; black) and lifetime of the ligand-bound conformation (lifetime high FRET state; purple) of

860 OppA as obtained from the most probable state-trajectory of the HMM of all molecules at different

861 peptide (RPPGFSPFR) concentrations. Data correspond to mean  $\pm$  s.e.m. and the solid line a linear fit.

862 Slope or intercept of the fit are shown (95% confidence interval). From the fit a dissociation constant

863  $K_D$  of  $14 \pm 4 \mu\text{M}$  (95% confidence interval) is obtained. (E) Isothermal calorimetry binding isotherms

864 of the titration of OppA with the peptide (RPPGFSPFR), which yielded a dissociation constant  $K_D$  of  $5$

865  $\pm 3 \mu\text{M}$  (mean  $\pm$  s.d.,  $n = 4$ ). Points are the data and the solid line a fit to a one site-binding model.



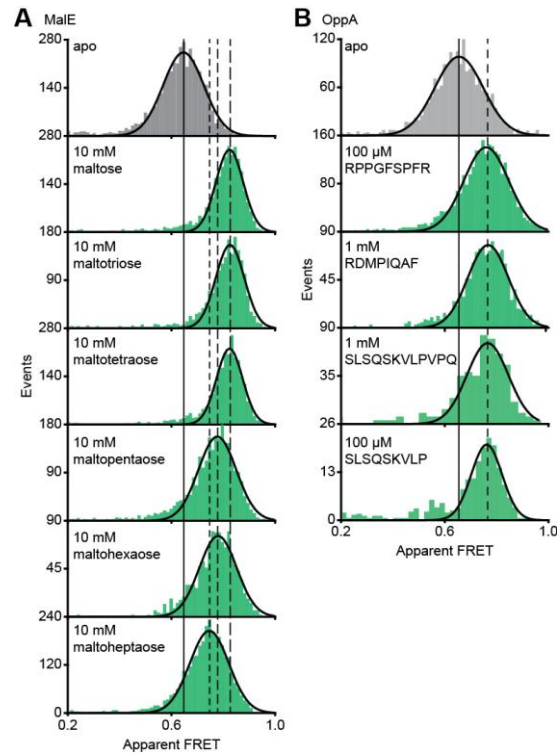

866

867 **Figure 2 – figure supplements 2. Translocation competent conformation(s) of MalE and OppA.**  
868 Solution-based apparent FRET efficiency histogram of MalE(T36C/S352C) (A) and  
869 OppA(A209C/S441C) (B) in the absence and presence of different cognate substrates as indicated.  
870 The OppA substrates are indicated by one-letter amino acid code. Bars are experimental data and the  
871 solid line a Gaussian distribution fit. The 95% confidence interval for the mean of the Gaussian  
872 distribution is shown in Table 3, and the interval centre is indicated by vertical lines (solid and  
873 dashed).

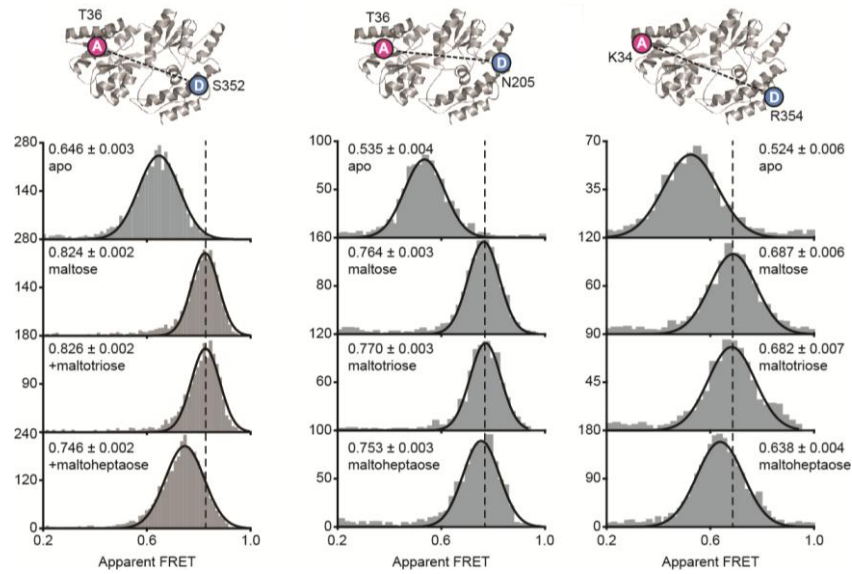

874

875 **Figure 2 – figure supplements 3. MalE conformations studied by smFRET.** Solution-based  
876 apparent FRET efficiency histogram of MalE(T36C/S352C), MalE(T36C/N205C) and  
877 MalE(K34C/R354C) in the absence and presence of different cognate substrates as indicated. Bars are  
878 experimental data and the solid line a Gaussian distribution fit. The 95% confidence interval for the  
879 mean of the Gaussian distribution is shown in Table 3, and the interval centre is indicated by vertical  
880 lines (solid and dashed). Structure of ligand-free MalE (PDB ID: 1OMP) with corresponding donor  
881 and acceptor fluorophore positions is indicated above the histograms.

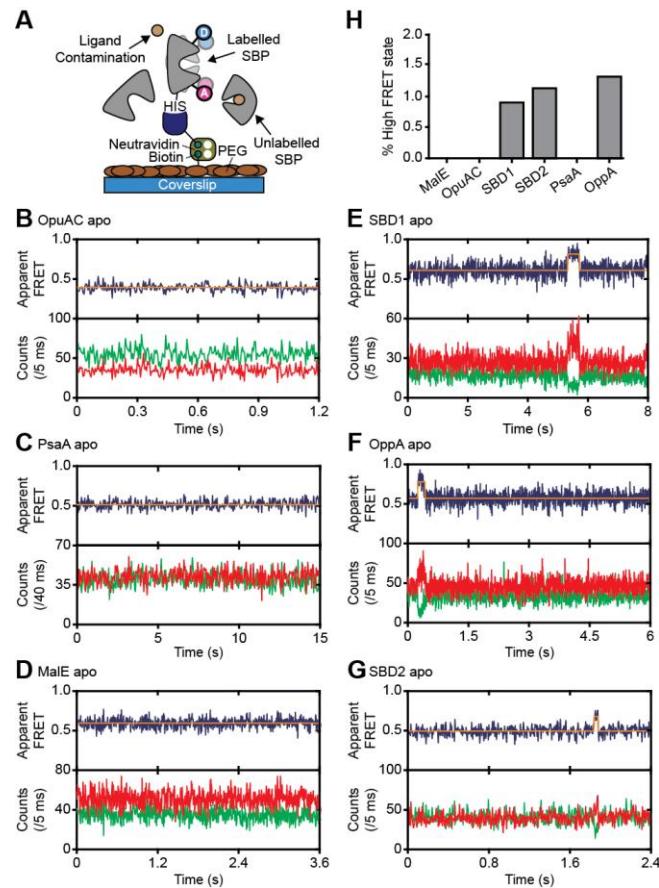

882

883 **Figure 3. Rare conformational states of ligand-free SBPs.** (A) Schematic of the experimental  
 884 strategy to study the conformational dynamics of ligand-free SBPs. Representative fluorescence  
 885 trajectories of OpuAC(V360C/N423C) (B), PsaA(V76C/K237C) (C), MalE(T36C/S352C) (D),  
 886 SBD1(T159C/G87C) (E), OppA(A209C/S441C) (F) and SBD2(T369C/S451) (G) in the absence of  
 887 substrate. 20  $\mu$ M of unlabelled protein or 1 mM EDTA (for PsaA) was added to scavenge any ligand  
 888 contaminations. In all fluorescence trajectories presented in the figure: top panel shows calculated  
 889 apparent FRET efficiency (blue) from the donor (green) and acceptor (red) photon counts as shown in  
 890 the bottom panels. Orange lines indicate average apparent FRET efficiency value or most probable  
 891 state-trajectory of the Hidden Markov Model (HMM). Statistics can be found in Table 4. (H)  
 892 Percentage of time a SBP is in the high FRET efficiency state. Statistics can be found in Table 4

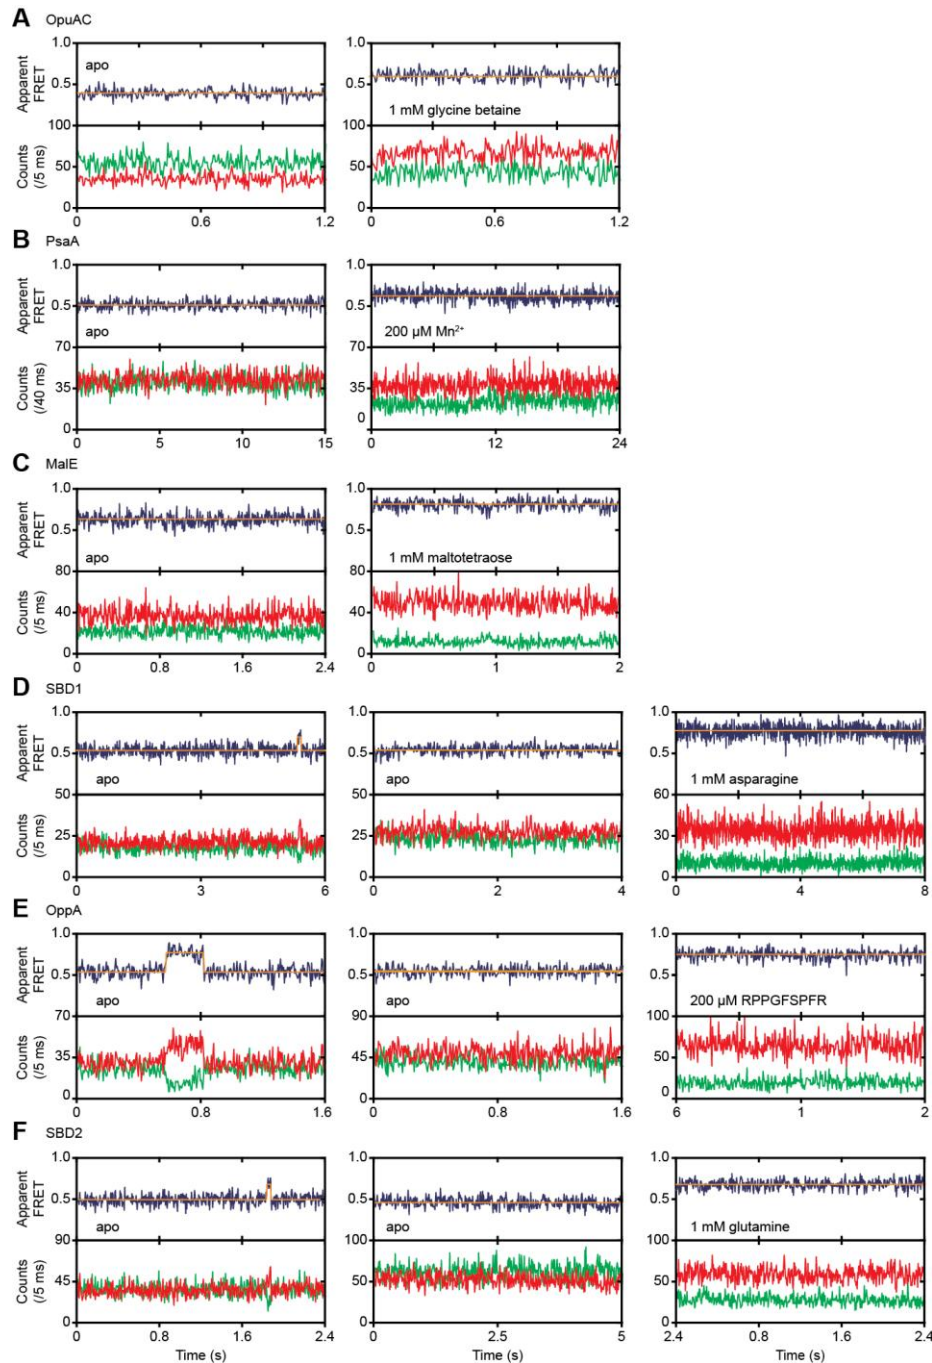

893

894 **Figure 3 – figure supplements 1. Conformational dynamics of ligand-free and ligand-bound**  
895 **SBPs.** Representative fluorescence trajectories of OpuAC(V360C/N423C) (A), PsaA(V76C/K237C)  
896 (B), MalE(T36C/S352C) (C), SBD1(T159C/G87C) (D), OppA(A209C/S441C) (E) and  
897 SBD2(T369C/S451) (F) in the absence of substrate and under saturating conditions of ligand, as  
898 indicated. In the absence of ligand, 20  $\mu$ M of unlabelled protein or 1 mM EDTA (for PsaA) was added  
899 to scavenge any ligand contaminations. The top panels show the calculated apparent FRET efficiency  
900 (blue) from the donor (green) and acceptor (red) photon counts as presented in bottom panels. Orange  
901 line indicate average apparent FRET efficiency value or most probable state-trajectory of the HMM.  
902 Statistics can be found in Table 4.

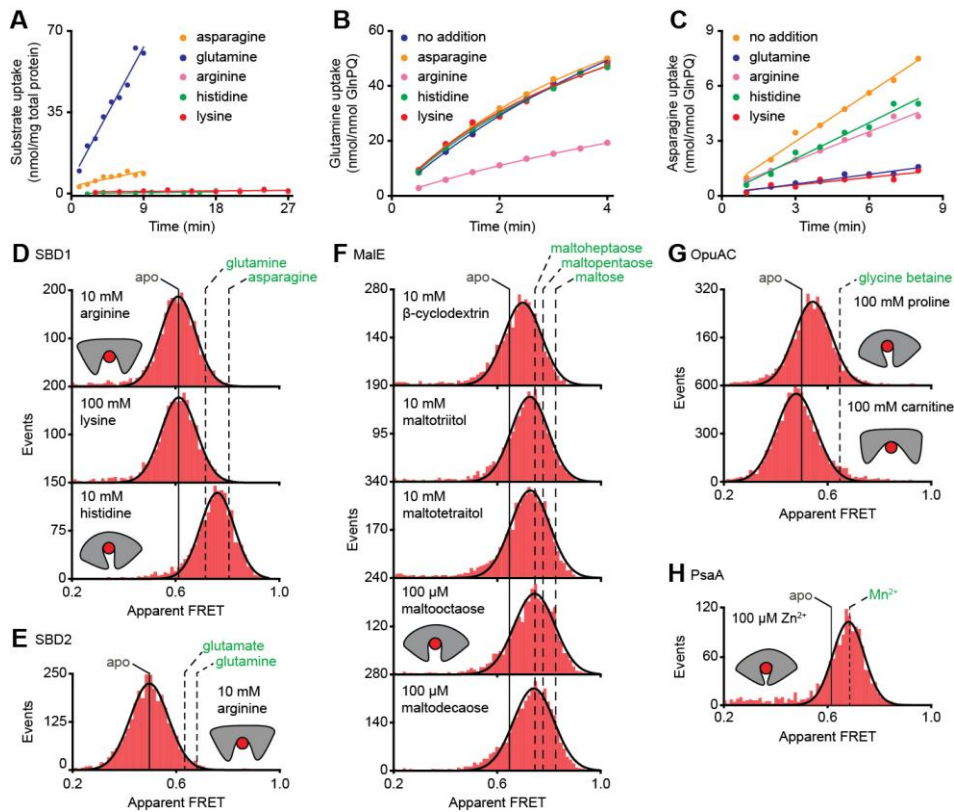

903

904 **Figure 4. Substrate-specificity of GlnPQ and SBP conformations induced by non-cognate**  
 905 **substrates.** (A) Time-dependent uptake [ $^{14}C$ ]-asparagine (5  $\mu$ M), [ $^{14}C$ ]-glutamine (5  $\mu$ M), [ $^{14}C$ ]-  
 906 arginine (100  $\mu$ M), [ $^{14}C$ ]-histidine (100  $\mu$ M) and [ $^3H$ ]-lysine (100  $\mu$ M) by GlnPQ in *L.*  
 907 *lactis* GKW9000 complemented *in trans* with a plasmid for expressing GlnPQ; the final amino acid  
 908 concentrations are indicated between brackets. Points are the data and the solid line a hyperbolic  
 909 fit. Time-dependent uptake of glutamine (B) and asparagine (C) in proteoliposomes reconstituted  
 910 with purified GlnPQ (see Methods section). The final concentrations of [ $^{14}C$ ]-glutamine and [ $^{14}C$ ]-  
 911 asparagine was 5  $\mu$ M, respectively; the amino acids indicated in the panel were added at a  
 912 concentration of 5 mM. Solution-based apparent FRET efficiency histogram of SBD1(T159C/G87C)  
 913 (D), SBD2(T369C/S451) (E), MalE(T36C/S352C) (F), OpuAC(V360C/N423C) (G) and  
 914 PsaA(V76C/K237C) (H) in the presence of non-cognate (red bars) substrates as indicated. Bars are  
 915 experimental data and solid line a Gaussian fit. The 95% confidence interval for the distribution mean  
 916 is shown in Table 3. The interval center is indicated by vertical lines (solid and dashed) for the  
 917 indicated condition.

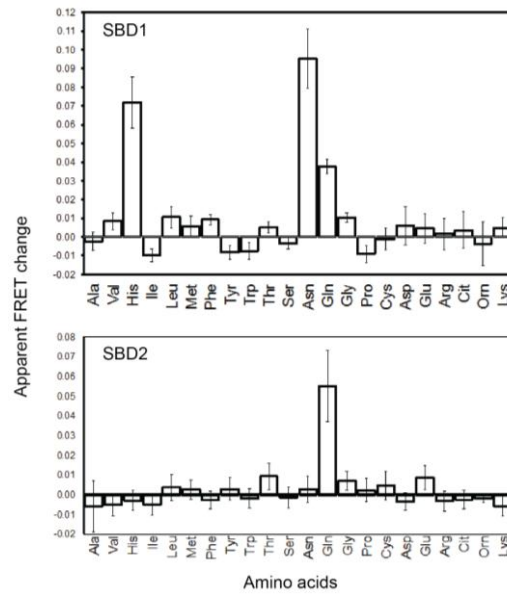

918

919 **Figure 4 – figure supplements 1. Substrate binding of SBD1 and SBD2 studied by ensemble**

920 **FRET.** The mean apparent FRET change of SBD1 (top) and SBD2 (bottom) in the presence of 5 mM  
921 of the indicated amino acids relative to their absence; measurements were performed in 50 mM KPi,  
922 50 mM KCl, pH 7.4. Amino acids are indicated by their three letter abbreviation. Data correspond to  
923 mean  $\pm$  s.d. of the apparent FRET change of duplicate measurements with the same labelled protein  
924 sample.

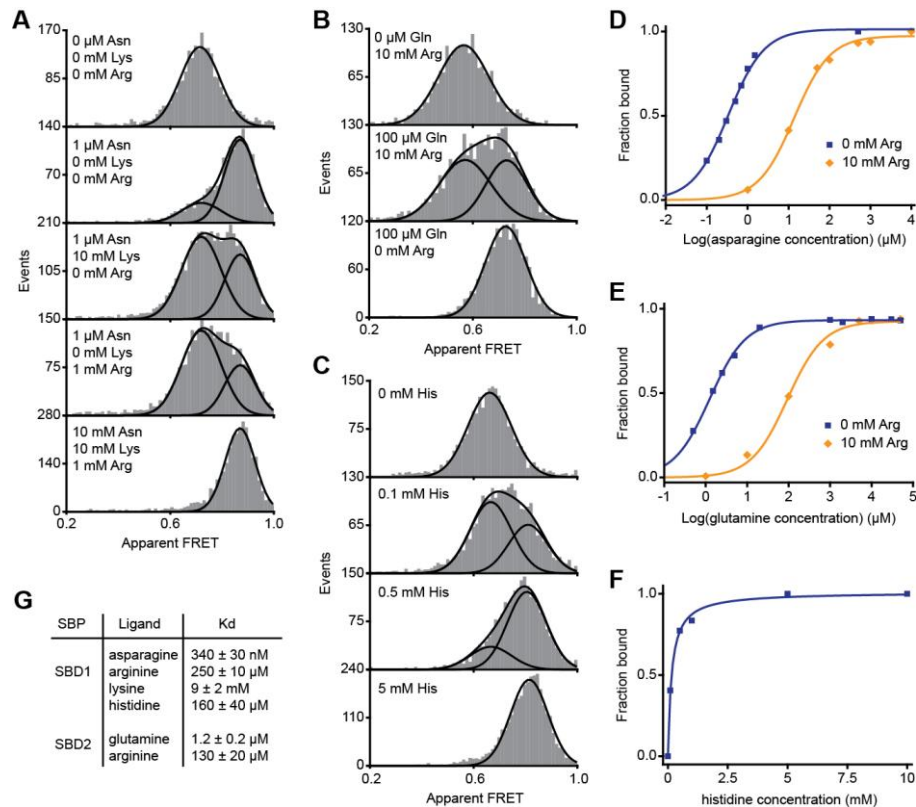

925

926 **Figure 4 – figure supplements 2. Non-cognate substrate binding by SBD1 and SBD2.** Solution-  
 927 based apparent FRET efficiency histograms of SBD1(T159C/G87C) (**A** and **C**) and  
 928 SBD2(T369C/S451) (**B**) in the presence of different ligand concentrations as indicated. Bars are  
 929 experimental data and the solid lines a fit to a mixture model with two Gaussian distributions or a fit  
 930 with a single Gaussian distribution. The mean of the Gaussian distributions was obtained from the  
 931 extreme conditions and fixed in the mixture model. Fraction of SBD1 bound to asparagine (**D**), SBD2  
 932 bound to glutamine (**E**) and SBD1 bound to histidine (**F**). Points are the data and the solid line a fit to  
 933 a one site-binding model. (**G**) Estimated dissociation constants  $K_D$  as obtained from the fit. Error bars  
 934 represent 95% confidence interval.

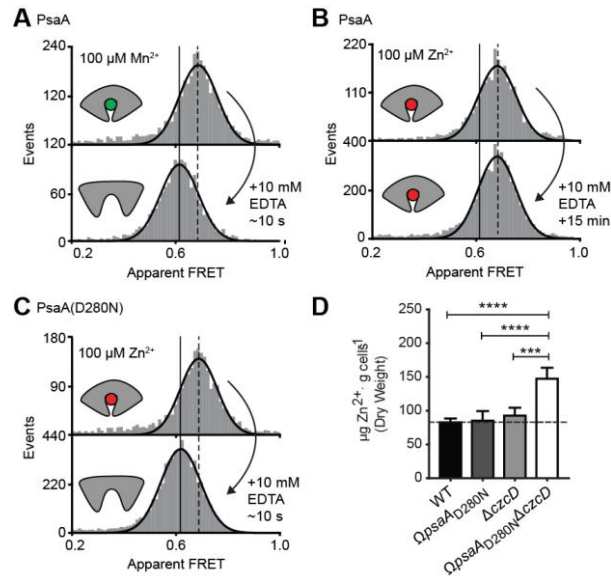

935

936 **Figure 5. Opening transition in PsaA dictates transport specificity.** Solution-based apparent FRET  
937 efficiency histograms of PsaA(V76C/K237C) in the presence of  $\text{Mn}^{2+}$  (A) or  $\text{Zn}^{2+}$  (B) and  
938 PsaA(D280N) in the presence of  $\text{Zn}^{2+}$  (C) upon addition of 10 mM EDTA and incubated for the  
939 indicated duration. Bars are experimental data and the solid line a Gaussian fit. The 95% confidence  
940 interval for the mean of the Gaussian distribution can be found in Table 3, and the interval centre is  
941 indicated by vertical lines (solid, metal-free and dashed, metal-bound). (D) Whole cell  $\text{Zn}^{2+}$   
942 accumulation of *S. pneumoniae* D39 and mutant strains in CDM supplemented with 50  $\mu\text{M}$   $\text{ZnSO}_4$  as  
943 determined by ICP-MS. Data correspond to mean  $\pm$  s.d.  $\mu\text{g Zn}^{2+} \cdot \text{g}^{-1}$  dry cell weight from three  
944 independent biological experiments. Statistical significance was determined by one-way ANOVA with  
945 Tukey post-test (\*\*\*)  $P < 0.005$  and (\*\*\*\*)  $P < 0.0001$ .



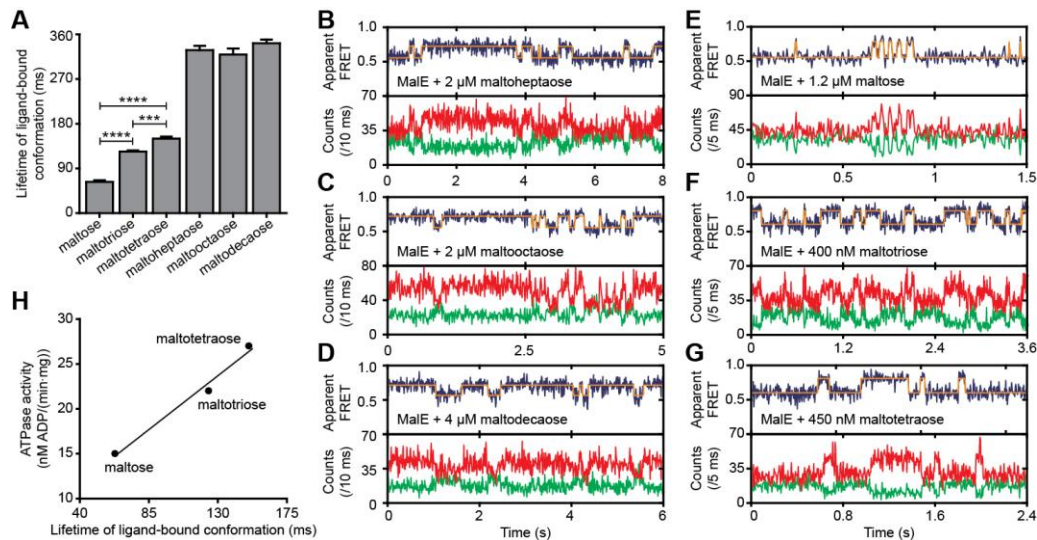

946

947 **Figure 6. Lifetime of MalE ligand-bound conformations and relation to activity.** (A) Mean  
 948 lifetime of the ligand-bound conformations of MalE, obtained from all single-molecule fluorescence  
 949 trajectories in the presence of different maltodextrins as indicated. Data corresponds to mean  $\pm$  s.e.m..  
 950 Histogram of the data are shown in Figure 6 – figure supplement 1. The statistical significance of the  
 951 differences in the mean data was determined by two-tailed unpaired *t*-tests (\*\*\* $P$ <0.005 and  
 952 \*\*\*\* $P$ <0.0001). (B, C, D, E, F and G) Representative fluorescence trajectories of  
 953 MalE(T36C/S352C) in the presence of different substrates as indicated. In all fluorescence trajectories  
 954 presented: top panel shows calculated apparent FRET efficiency (blue) from the donor (green) and  
 955 acceptor (red) photon counts as shown in the bottom panels. Most probable state-trajectory of the  
 956 Hidden Markov Model (HMM) is shown (orange). (H) Published ATPase activity<sup>16</sup> linked to the  
 957 lifetime of the closed MalE conformation induced by transport of different cognate substrates as  
 958 indicated. Points are the data and the solid line a simple linear regression fit.

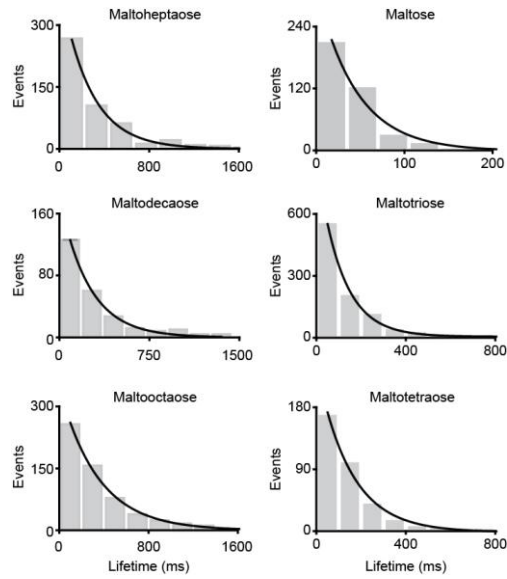

959

960 **Figure 6 – figure supplements 1. Distribution of the ligand-bound conformations of MalE.** Dwell  
961 time histogram of the high FRET (closed ligand-bound conformation) as obtained from the most  
962 probable state-trajectory of the HMM of all molecules per condition as shown in Figure 6. Grey bars  
963 are the binned data and the solid line an exponential fit. Statistics can be found in Table 4.

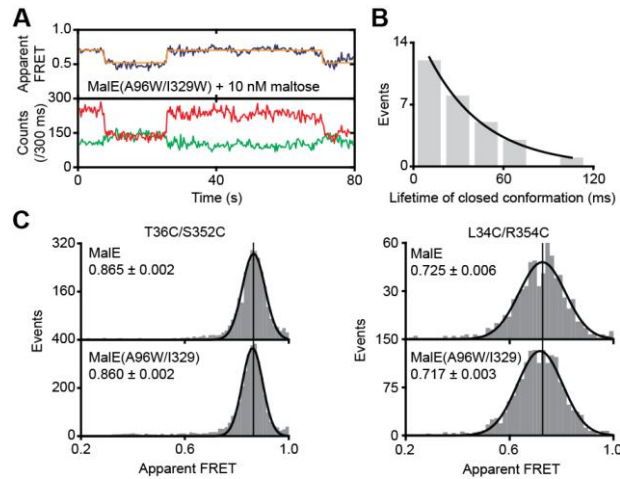

964

965 **Figure 6 – figure supplements 2. Conformational changes and dynamics of MalE(A96W/I329W).**

966 (A) Representative fluorescence trajectories of MalE(T36C/S352C/A96W/I329W) in the presence of  
967 10 nM maltose. Fluorescence trajectories: the top panel shows the calculated apparent FRET  
968 efficiency (blue) from the donor (green) and acceptor (red) photon counts as shown in the bottom  
969 panel. The most probable state-trajectory of the Hidden Markov Model (HMM) is shown (orange). (B)  
970 Dwell time histogram of the high FRET state (closed conformation) as obtained from the most  
971 probable state-trajectory of the HMM of all molecules. Grey bars are the binned data and the solid line  
972 is an exponential fit. Statistics can be found in Table 4. (C) Solution-based apparent FRET efficiency  
973 histogram of MalE and MalE(A96W/I329W) in the presence of 1 mM maltose for the indicated inter-  
974 dye positions. Bars are experimental data and solid line a Gaussian distribution fit. The 95%  
975 confidence interval for the mean of the Gaussian distribution is indicated.

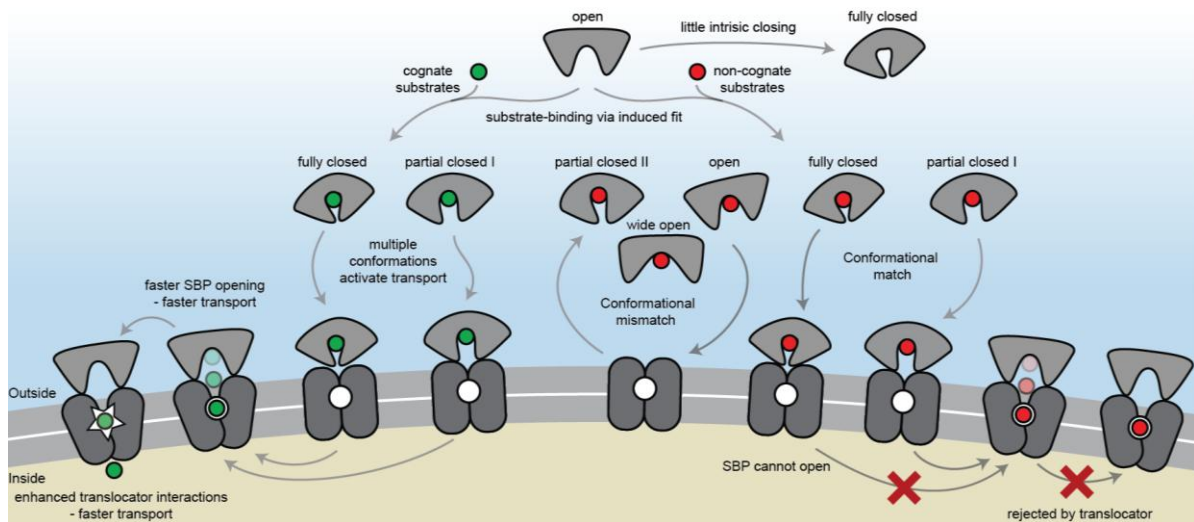

976

977 **Figure 7. The conformational changes and dynamics of SBPs and the regulation of transport.**

978 Schematic summarizing the plasticity of ligand binding and solute import via ABC importers. Intrinsic  
979 closing of an SBP is a rare event or absent at all in some SBPs ('little intrinsic closing'). Ligands are  
980 bound via induced fit ('ligand-binding via induced fit'). SBPs can acquire one or more conformations  
981 that can activate transport ('multiple conformations activate transport'). Variations in cognate  
982 substrate transport are caused by: (i) openings rate of the SBP and substrate transfer to the translocator  
983 ('faster SBP opening – faster transport') and (ii) substrate-dependent translocator interactions  
984 ('enhanced translocator interactions – faster transport'). Although SBPs can acquire a conformation  
985 that activates transport ('conformational match'), transport still fails when: (i) the SBP has no affinity  
986 for the translocator and/or cannot make the allosteric interaction with the translocator ('conformational  
987 mismatch'); (ii) the SBP cannot open and release the substrate to the translocator ('SBP cannot open');  
988 or (iii) due to the specificity of the translocator ('rejected by translocator').

989 **Table 1. Dissociation constants of substrate-binding proteins**

| Protein <sup>d</sup> | Ligand          | K <sub>D</sub> labelled protein <sup>e</sup> (μM) | K <sub>D</sub> WT protein <sup>f</sup> (μM) |
|----------------------|-----------------|---------------------------------------------------|---------------------------------------------|
| OpuAC(V360C/N423C)   | Glycine betaine | 3.4 ± 0.4 <sup>a</sup>                            | 4-5 <sup>38</sup>                           |
| OppA(A209C/S441C)    | RPPGFSFR        | 14 ± 3 <sup>b</sup>                               | 5 ± 3 <sup>b</sup>                          |
| SBD2(T369C/S451)     | Glutamine       | 1.2 ± 0.2 <sup>c</sup>                            | 0.9 ± 0.1 <sup>29</sup>                     |
| SBD1(T159C/G87C)     | Asparagine      | 0.34 ± 0.03 <sup>c</sup>                          | 0.2 ± 0.0 <sup>29</sup>                     |
| MalE(T36C/S352C)     | Maltose         | 1.7 ± 0.3 <sup>a</sup>                            | 1 <sup>42</sup>                             |

990

991 a. Population of the closed conformation  $P$  in the presence of a ligand concentration  $L$  was  
992 determined using solution-based smFRET. The  $K_D = L(1 - P)/P$  for a one-binding site  
993 model. Data corresponds to mean ± s.d. of duplicate experiments with the same labelled  
994 protein sample.

995 b. See Figure 2 – figure supplement 1.

996 c. See Figure 4 – figure supplement 2.

997 d.  $K_D$  could not be determined reliably for labelled PsaA due to metal contaminations.

998 e. The proteins were labelled with Alex555 and Alexa647 or Cy3B and Atto647N as described  
999 in the method section.

1000 f. The  $K_D$  values of wildtype (WT) proteins are obtained from the indicated references.

1001 **Table 2. Steady-state anisotropy values**

|                    | Anisotropy |          |      |          |
|--------------------|------------|----------|------|----------|
|                    | Alex555    | Alexa647 | Cy3B | Atto647N |
| Free dye           | 0.25       | 0.20     | 0.08 | 0.08     |
| OpuAC(V360C/N423C) | NA         | NA       | 0.17 | 0.11     |
| OppA(A209C/S441C)  | 0.25       | 0.19     | NA   | NA       |
| SBD1(G87C/T159C)   | 0.27       | 0.19     | NA   | NA       |
| SBD2(T369C/S451)   | 0.26       | 0.20     | NA   | NA       |
| MalE(T36C/S352C)   | 0.29       | 0.24     | NA   | NA       |
| PsaA(V76C/K237C)   | 0.28       | 0.22     | NA   | NA       |

1002 NA: not applicable. Data corresponds to mean (s.d. below <0.01) of duplicate experiments with the  
1003 same labelled protein sample.

1004 **Table 3. Apparent FRET efficiency values of solution-based measurements**

| Protein            | Condition        | Apparent FRET* |
|--------------------|------------------|----------------|
| OpuAC(V360C/N423C) | no ligand        | 0.501 ± 0.004  |
|                    | proline          | 0.479 ± 0.003  |
|                    | carnitine        | 0.543 ± 0.004  |
|                    | glycine betaine  | 0.646 ± 0.003  |
| OppA(A209C/S441C)  | no ligand        | 0.655 ± 0.005  |
|                    | RPPGFSPFR        | 0.767 ± 0.004  |
|                    | RDMPIQAF         | 0.760 ± 0.004  |
|                    | SLSQSKVLPVPQ     | 0.761 ± 0.006  |
|                    | SLSQSKVLP        | 0.770 ± 0.009  |
| SBD2(T369C/S451)   | no ligand        | 0.492 ± 0.003  |
|                    | glutamate        | 0.633 ± 0.004  |
|                    | glutamine        | 0.677 ± 0.002  |
|                    | arginine         | 0.496 ± 0.002  |
| SBD1(G87C/T159C)   | no ligand        | 0.612 ± 0.003  |
|                    | glutamine        | 0.710 ± 0.003  |
|                    | asparagine       | 0.805 ± 0.002  |
|                    | histidine        | 0.761 ± 0.003  |
|                    | arginine         | 0.610 ± 0.002  |
|                    | lysine           | 0.613 ± 0.002  |
| MalE(T36C/S352C)   | no ligand        | 0.646 ± 0.003  |
|                    | B-cyclodextrin   | 0.696 ± 0.003  |
|                    | maltotriitol     | 0.725 ± 0.003  |
|                    | maltotetraitol   | 0.725 ± 0.003  |
|                    | maltose          | 0.824 ± 0.002  |
|                    | maltotriose      | 0.826 ± 0.003  |
|                    | maltotetraose    | 0.824 ± 0.002  |
|                    | maltopentaose    | 0.777 ± 0.004  |
|                    | maltohexaose     | 0.779 ± 0.003  |
|                    | maltoheptaose    | 0.746 ± 0.002  |
|                    | maltooctaose     | 0.745 ± 0.003  |
|                    | maltodecaose     | 0.742 ± 0.003  |
| MalE(T36C/N205C)   | no ligand        | 0.538 ± 0.007  |
|                    | maltoheptaose    | 0.755 ± 0.005  |
|                    | maltooctaose     | 0.758 ± 0.005  |
|                    | maltodecaose     | 0.757 ± 0.006  |
| MalE(K34C/R354C)   | no ligand        | 0.524 ± 0.010  |
|                    | maltoheptaose    | 0.669 ± 0.008  |
|                    | maltooctaose     | 0.662 ± 0.007  |
|                    | maltodecaose     | 0.666 ± 0.008  |
| PsaA(V76C/K237C)   | no ligand        | 0.615 ± 0.003  |
|                    | Mn <sup>2+</sup> | 0.681 ± 0.004  |
|                    | Zn <sup>2+</sup> | 0.687 ± 0.005  |

|                        |                  |                   |
|------------------------|------------------|-------------------|
| PsaA(E74C/K237C)       | no ligand        | $0.518 \pm 0.003$ |
|                        | Mn <sup>2+</sup> | $0.567 \pm 0.003$ |
|                        | Zn <sup>2+</sup> | $0.570 \pm 0.003$ |
| PsaA(D280N/V76C/K237C) | no ligand        | $0.617 \pm 0.003$ |
|                        | Zn <sup>2+</sup> | $0.688 \pm 0.006$ |

1005 \*95% confidence interval for the mean of the Gaussian distribution fit

1006 \*\*Only data of the same protein construct can be compared (all recorded on one day), due to  
1007 unavoidable differences in microscope settings when measurements are done on different days.  
1008 Qualitatively consistent results were obtained upon repetition with an independent labelled protein  
1009 sample and measured on a different day.



1010 **Table 4. Statistics of confocal scanning experiments of immobilized molecules.**

| Protein*                    | Condition                    | Molecules analysed | Total                  |                      |
|-----------------------------|------------------------------|--------------------|------------------------|----------------------|
|                             |                              |                    | observation time (min) | Transitions observed |
| OpuAC(V360C/N423C)          | no ligand                    | 702                | 8.2                    | 0                    |
|                             | 1 mM Glycine Betaine         | 78                 | 2.3                    | 0                    |
| OppA(A209C/S441C)           | no ligand                    | 326                | 11.0                   | 37                   |
|                             | 2.5 $\mu$ M RPPGFSPFR        | 39                 | 1.4                    | 329                  |
|                             | 5 $\mu$ M RPPGFSPFR          | 168                | 6.0                    | 2166                 |
|                             | 10 $\mu$ M RPPGFSPFR         | 29                 | 0.7                    | 280                  |
|                             | 20 $\mu$ M RPPGFSPFR         | 65                 | 2.4                    | 1837                 |
|                             | 200 $\mu$ M RPPGFSPFR        | 31                 | 0.5                    | 0                    |
| SBD1(G87C/T159C)            | no ligand                    | 384                | 16.1                   | 67                   |
|                             | 1 mM asparagine              | 72                 | 8.0                    | 0                    |
| SBD2(T369C/S451)            | no ligand                    | 251                | 9.7                    | 64                   |
|                             | 1 mM glutamine               | 34                 | 1.0                    | 0                    |
| MalE(T36C/S352C)            | no ligand                    | 503                | 10.9                   | 0                    |
|                             | 1 mM maltotetraose           | 32                 | 1.2                    | 0                    |
|                             | 1.2 $\mu$ M maltose          | 37                 | 1.6                    | 378                  |
|                             | 400 nM maltotriose           | 144                | 7.2                    | 968                  |
|                             | 450 nM maltotetraose         | 70                 | 1.8                    | 345                  |
|                             | 2 $\mu$ M maltoheptaose      | 61                 | 4.9                    | 591                  |
|                             | 2 $\mu$ M maltooctaose       | 50                 | 2.2                    | 491                  |
|                             | 4 $\mu$ M maltodecaose       | 75                 | 4.9                    | 257                  |
| MalE(T36C/S352C/A96W/I329W) | 10 nM maltose                | 20                 | 20.4                   | 30                   |
| PsaA(76C/K237C)             | no ligand                    | 254                | 26.3                   | 0                    |
|                             | 200 $\mu$ M Mn <sup>2+</sup> | 35                 | 5.8                    | 0                    |

1011 \* Fluorescence trajectories of 2 independent labelled proteins samples where pooled and analyzed.

1012 **Table 5. Primers used in this study**

| Protein                | Primer (5' to 3')                                      |
|------------------------|--------------------------------------------------------|
| Forward PsaA(V76C)     | CAAATCAGCCTCAGAAGTTTTCTTGCAGTCTTCAGGAAGTGGTTCGTATTC    |
| Reverse PsaA(V76C)     | GAATACGAACCACTTCTCCTGAAGACTGCAAGAAAACCTTCTGAGGCTGATTTG |
| Forward PsaA(K237C)    | GGCGAAGTTTTCAACCAAGGTGCAGATTTGTTTCAGGAGTTCCTTCT        |
| Reverse PsaA(K237C)    | AGAAGGAACTCCTGAACAAATCTGCACCTTGTTGAAAAACTTCGCC         |
| Forward OpuAC(V360C)   | ACAGCTTTAGATAATGCGTGTGCTTGCCAAACAGTAGCC                |
| Reverse OpuAC(V360C)   | GGCTACTGTTTGCCAAGCACACGCATTATCTAAAGCTGT                |
| Forward OpuAC(N423C)   | TCAATTGAAGATTTAACATGTCAAGCGAATAAAACAATC                |
| Reverse OpuAC(N423C)   | GATTGTTTTATTTCGCTTGACATGTTAAATCTTCAATTGA               |
| Reverse OppA(A209C)    | TGTCGTTTTGGACTAGAACACAAATCTTAGGAGCGAC                  |
| Forward OppA(S441C)    | AAAATTGGGGTAAAAGTGTGTCTTTATAACGGTAAATTG                |
| Forward SBD2(T369C)    | AAAGACCTTAAAGGTAAATGCCTTGGTGCTAAAAACGGA                |
| Reverse SBD2(T369C)    | TCCGTTTTTAGCACCAAGGCATTTACCTTTAAGGTCTTT                |
| Forward SBD2(S451)     | TTTGCTGTTAAAAAAGGATGCAATCCAGAGTTGATTGAA                |
| Reverse SBD2(S451)     | TTCAATCAACTCTGGATTGCATCCTTTTTAACAGCAA                  |
| Forward MalE(T36C)     | GATACCGGAATTAAGTCTGCGTTGAGCATCCGGATAAA                 |
| Reverse MalE(T36C)     | TTTATCCGGATGCTCAACGCAGACTTTAATTCCGGTATC                |
| Forward MalE(S352C)    | GTGATCAACGCCGCCTGCGGTCGTCAGACTGTC                      |
| Reverse MalE(S352C)    | GACAGTCTGACGACCGCAGGCGGCGTTGATCAC                      |
| Forward MalE(N205C)    | ATTAAAAACAAACACATGTGCGCAGACACCGATTACTCC                |
| Reverse MalE(N205C)    | GGAGTAATCGGTGTCTGCGCACATGTGTTTGTITTAAT                 |
| Forward MalE(K34C)     | GAGAAAGATACCGGAATTTGCGTCACCGTTGAGCATCCG                |
| Reverse MalE(K34C)     | CGGATGCTCAACGGTGACGCAAATCCGGTATCTTTCTC                 |
| Forward MalE(R354C)    | AACGCCGCCAGCGGTTGCCAGACTGTGCGATGAA                     |
| Reverse MalE(R354C)    | TTCATCGACAGTCTGGCAACCGCTGGCGGCGTT                      |
| Forward MalE(A96W)     | TATCCGTTTACCTGGGATTGGGTACGTTACAACGGCAAG                |
| Reverse MalE(A96W)     | CTTGCCGTTGTAACGTACCCAATCCCAGGTAACGGATA                 |
| Forward MalE(I329W)    | AACGCCAGAAAGGTGAATGGATGCCGAACATCCCGCAG                 |
| Reverse MalE(I329W)    | CTGCGGGATGTTCCGCATCCATTACCTTTCTGGGCGTT                 |
| Forward MalE isolation | GGGAATTCCATATGAAA ATCGAAGAAGGTAAACTGGTAATCTGG          |
| Forward MalE isolation | GACCCGAAGCTTCTTGGTGATACGAGTCTGCGCGTCTTTCAGGGCTTC       |
| psaA_F                 | GGAAAAAAGATACAACCTTCTGGTC                              |
| psaA_R                 | TTATTTTGCCAATCCTTCAG                                   |
| psaA_X                 | GACCAGAAGTTGTATCTTTTTTTCC                              |
| psaA_Y                 | CTGAAGGATTGGCAAATAA                                    |
| psaA_Flank_F           | CTGGTCTAAATCAACAAAACCTC                                |
| psaA_Flank_R           | GACCTATAGCTTACTAGCTCTTGTCTT                            |
| czcD_Flank_F           | GAGCCCAATTTCTGTCTGGG                                   |
| czcD_Flank_R           | TAGCTATCGGTGCCCTCCG                                    |
| czcD_F                 | ATGAAGGCAAATATGCTGTTTG                                 |
| czcD_R                 | CTAATGTTGATGCTCATAACTCCG                               |
| czcD_X                 | CAAACAGCATATTTTGCCTTCAT                                |
| czcD_Y                 | CGGAGTTATGAGCATCAACATTAG                               |
| czcD_Janus_X           | CATTATCCATTAATAATCAAACGGTATTTCAGTTCTGAACAATTTGCC       |
| czcD_Janus_Y           | GGAAAGGGGCCAGGTCTCTGTGAAAAATACTTGGGTACTATCTT           |
| psaAD280N_F            | CCCAATCTACGCACAAATCTTACTAACTCTATCGCAGA                 |
| psaAD280N_R            | TCTGCGATAGAGTTAGTAAAGATTTGTGCGTAGATTGGG                |

1013
